1 **Hypoxic environment promotes barrier formation in human intestinal**  
2 **epithelial cells through regulation of miRNA-320a expression**

3 Stephanie Muenchau<sup>1</sup>, Rosalie Deutsch<sup>1</sup>, Thomas Hielscher<sup>2</sup>, Nora Heber<sup>1</sup>, Beate Niesler<sup>3</sup>,

4 Megan L. Stanifer<sup>1,#,\*</sup>, Steeve Boulant<sup>1,4,#,\*</sup>

5 Running title: hypoxamiR-mediated barrier function in IECs

6 Key words: barrier function, hypoxia, tight junctions, miRNA, intestinal epithelial cells

7

8 <sup>1</sup>Schaller research group at CellNetworks, Department of Infectious Diseases, Virology,  
9 Heidelberg University Hospital, Germany

10 <sup>2</sup>Division of Biostatistics, German Cancer Research Center (DKFZ), Heidelberg, Germany

11 <sup>3</sup>Department of Human Molecular Genetics, Institute of Human Genetics, University of  
12 Heidelberg, Heidelberg, Germany

13 <sup>4</sup>Research Group „Cellular Polarity of Viral Infection“, German Cancer Research Center (DKFZ),  
14 Heidelberg, Germany

15 \*These authors contributed equally to the work

16 #Corresponding authors

17

18

19

20 Steeve Boulant, Ph.D.

21 Department of Infectious Disease, Virology

22 Schaller research group at CellNetworks and DKFZ

23 Heidelberg Hospital University

24 Im Neuenheimer Feld 344

25 69120 Heidelberg, Germany

26 Phone: +49 (0) 6221 56 7865

27 Email: [s.boulant@dkfz.de](mailto:s.boulant@dkfz.de)

28

29 Megan L. Stanifer, Ph.D.

30 Department of Infectious Disease, Virology

31 Heidelberg Hospital University

32 Im Neuenheimer Feld 344

33 69120 Heidelberg, Germany

34 Phone: +49 (0) 6221 56 7858

35 Email: [m.stanifer@dkfz.de](mailto:m.stanifer@dkfz.de)

36

37 Word count: 1431 (Material & Methods), 4091 (Introduction, Results, Discussion)

38 **Abstract**

39 Intestinal epithelial cells (IECs) are exposed to the low-oxygen environment present in the  
40 lumen of the gut. These hypoxic conditions are on one hand fundamental for the survival of  
41 the commensal microbiota, and on the other hand, favor the formation of a selective  
42 semipermeable barrier allowing IECs to transport essential nutrients/water while keeping the  
43 sterile internal compartments separated from the lumen containing commensals. The  
44 hypoxia-inducible factor (HIF) complex, which allows cells to respond and adapt to fluctuations  
45 in oxygen levels, has been described as a key regulator in maintaining IEC barrier function by  
46 regulating their tight junction integrity. In this study, we sought to better evaluate the  
47 mechanisms by which low oxygen conditions impact the barrier function of human IECs. By  
48 profiling miRNA expression in IECs under hypoxia, we identified miRNA-320a as a novel barrier  
49 formation regulator. Using pharmacological inhibitors and short hairpin RNA-mediated  
50 silencing we could demonstrate that expression of this miRNA was HIF-dependent.  
51 Importantly, using over-expression and knock-down approaches of miRNA-320a we could  
52 confirm its direct role in the regulation of barrier functions in human IECs. These results reveal  
53 an important link between miRNA expression and barrier integrity, providing a novel insight  
54 into mechanisms of hypoxia-driven epithelial homeostasis.

## 55 Introduction

56 The human gastrointestinal (GI) tract is the organ forming the largest barrier towards  
57 the external environment and a key player in nutrient absorption (1). It is made of a monolayer  
58 of epithelial cells separating the *lamina propria* from the lumen of the gut. This epithelium on  
59 the one hand allows for the translocation of nutrients, water and electrolytes from the lumen  
60 to the underlying tissue and, on the other hand, builds up a tight barrier to prevent  
61 penetration of commensal bacteria and potential harmful microorganisms (bacterial and viral)  
62 to the *lamina propria* (1). Although these luminal microorganisms have well characterized  
63 beneficial functions for the host, they can represent a risk when epithelial barrier and gut  
64 homeostasis are disrupted. Altered barrier functions increase the risk of enteric pathogen  
65 infection and can lead to the dysregulation of the mechanisms leading to the tolerance of the  
66 commensals which ultimately can lead to inflammation of the GI tract and the development  
67 of chronic diseases like inflammatory bowel disease (IBD), including Crohn's disease (CD) and  
68 ulcerative colitis (UC) (2, 3). Multiple cellular strategies are utilized to physically separate the  
69 content of the gut lumen from the host. First, goblet cells and Paneth cells in the mucosal  
70 lining secrete mucus together with antimicrobial and antiviral peptides which forms a layer of  
71 separation between the intestinal epithelial cells and the luminal content of the digestive tract  
72 (4–6). Second, epithelial cells polarize and express tightly juxtaposed adhesive junctional  
73 complexes between neighbouring cells. These junctional complexes are composed of integral  
74 transmembrane proteins that are linked via intracellular scaffoldings proteins to the actin  
75 cytoskeleton (7). This tight organization of intestinal epithelial cells (IECs) inhibits paracellular  
76 diffusion of ions and other solutes as well as antigenic material (8). The junctional complex  
77 therefore is essential for establishing and maintaining the barrier function of the mucosal layer  
78 and is composed of tight and adherens junction proteins such as claudins, occludin, junctional

79 adhesion molecule-A (JAM-A), tricellulin, zona occludens-1 (ZO-1) and E-cadherin (8). The  
80 interaction between the different tight junction and adherens junction proteins thus creates  
81 a tight epithelial barrier and determines selective permeability through the intestinal  
82 epithelium.

83         Within the physiological organization of the GI tract, an important but often  
84 overlooked parameter is the low oxygen level present in the lumen of the gut. This  
85 environment is fundamental for the survival of many commensals. Within the complex 3D  
86 organization of the crypt-villus axis, the tip of the villi protrudes into the low oxygen (1-2%)  
87 environment of the gut (hypoxic environment) (9). Conversely, within of the mucosal lining,  
88 oxygen-rich blood vessels are located in the subepithelium, providing the stem cell containing  
89 crypts with a high oxygen content of around 8-21% (normoxic environment) (10, 11). Besides  
90 this oxygen gradient among the intestinal epithelium, the subepithelium of the GI tract is also  
91 exposed to daily fluctuations in oxygen content. After food ingestion, the intestinal blood flow  
92 increases and the oxygen content in the subepithelium rises up to 40-64%, but can also  
93 decrease below 8% under fasting conditions (12, 13).

94         Cells respond to the hypoxic environment by specifically regulating the expression of  
95 hundreds of genes through the major hypoxic-induced transcription factor hypoxia inducible  
96 factor (HIF) (14). HIFs are heterodimeric transcription factors that are composed of a  
97 constitutively expressed HIF- $\beta$  subunit and one of the three oxygen-regulated alpha subunits  
98 (HIF-1 $\alpha$ , HIF-2 $\alpha$  or HIF-3 $\alpha$ ) (15). Under normoxic conditions, HIF-1 $\alpha$  is rapidly hydroxylated at  
99 specific proline residues by different prolyl hydroxylases (PHD's), leading to binding to the E3  
100 ubiquitin ligase containing the von Hippel-Lindau (VHL) tumor suppressor protein,  
101 polyubiquitination and subsequent proteasomal degradation of the protein (16). Under  
102 hypoxic conditions, lack of substrates such as Fe<sup>2+</sup>, 2-oxoglutarate and O<sub>2</sub> inhibits

103 hydroxylation (17), therefore stabilizing HIF-1 $\alpha$  and leading to dimerization with its  
104 constitutively expressed  $\beta$ -subunit (HIF-1 $\beta$ ), translocation to the nucleus and binding of the  
105 coactivators CBP (CREB-binding protein) and p300 (18). This enables the complex to bind to  
106 target genes at the consensus sequence 5'-RCGTG-3' (where R refers to A or G) and leads to  
107 formation of the transcription initiation complex (TIC) with subsequent expression of many  
108 genes that promote erythropoiesis, angiogenesis, glucose transport and metabolism, all  
109 needed in adaptation to low oxygen concentrations (19).

110         Beside the importance of hypoxia for the commensal flora, it has been shown that low  
111 oxygen conditions also impact epithelial cells by inducing secretion of several proteins into the  
112 surrounding of the cells, including cytokines and growth factors (20). Precisely, in the context  
113 of epithelial barrier function, the intestinal trefoil factors (TFFs) exhibit intestinal-specific  
114 barrier-protective features and are specifically upregulated under hypoxia through a hypoxia  
115 inducible factor HIF-1 $\alpha$ -dependent manner (21). The molecular mechanisms of TFF function  
116 and how they achieve the barrier protection is still not fully understood. Recent publications  
117 indicate a stabilizing effect on mucosal mucins (22), induction of cellular signals that modulate  
118 cell-cell junctions of epithelia leading to increased levels of claudin-1, impairment of adherens  
119 junctions and facilitation of cell migration in wounded epithelial cell layers (23–25).

120         In recent years it has become appreciated that hypoxia additionally regulates the  
121 expression of an expanding but specific subset of miRNAs, termed hypoxamiRs (26, 27).  
122 miRNAs are endogenous, small non-coding RNAs that consist of 18-23 nucleotides. After  
123 transcription and subsequent maturation, the functional strand of the mature miRNA is  
124 loaded into the RNA-induced silencing complex (RISC), where it silences target mRNAs through  
125 mRNA cleavage, translational repression or deadenylation (28). miRNAs coordinate complex  
126 regulatory events relevant to a variety of fundamental cellular processes (29). Although it has

127 been shown that miRNAs can participate in the regulation of barrier function (30), it remains  
128 unclear whether the hypoxic environment in the lumen of the gut can induce the expression  
129 of a specific subsets of hypoxamiRs which in turn will influence barrier function of the  
130 intestinal epithelium.

131 In the current study, we sought to investigate how hypoxia impacted the formation of  
132 a tight barrier in human intestinal epithelial cells. We found that human intestinal cells grown  
133 under hypoxic conditions more rapidly displayed barrier functions compared to cells grown  
134 under normoxia. We could correlate this improved barrier function with the faster assembly  
135 of the tight junction belt under low oxygen conditions. Through transcriptome microarray  
136 analysis, we identified three hypoxamiRs, miRNA-320a, miRNA-16-5p and miRNA-34a-5p,  
137 known to play a role in barrier formation. Using overexpression and depletion experiments,  
138 we could demonstrate that miRNA-320a acts as a key player in promoting barrier formation  
139 in human intestinal epithelial cells under hypoxic conditions. Our data demonstrates that the  
140 hypoxic condition around intestinal epithelial cells regulates the expression of a specific  
141 subsets of miRNAs which in turn participates in the establishment of a fully functional  
142 epithelial barrier. Importantly, our work highlights the importance of studying the cellular  
143 functions of intestinal epithelial cells under their physiological hypoxic environment.

144

## 145 **Results**

146 **Low oxygen levels improve barrier function in human intestinal epithelial cells.** The gastro-  
147 intestinal tract is characterized by a steep oxygen gradient along the crypt-villus axis with high  
148 levels of oxygen at the bottom of the crypts and a low oxygen environment at the tip of the  
149 villi (10). Several studies (21, 31, 32) have shown that low oxygen concentrations can influence  
150 the barrier function of epithelial cells *in vitro* by changing gene expression profiles and  
151 inducing secretion of barrier-regulating proteins, i.e. TFFs. To investigate the mechanism by  
152 which hypoxic conditions regulate barrier function, the T84 colon adenocarcinoma-derived  
153 cell line was seeded onto transwell inserts and allowed to polarize under normoxic (21% O<sub>2</sub>)  
154 or hypoxic (1% O<sub>2</sub>) conditions. To determine the effect of hypoxia on the ability of T84 cells to  
155 form a tight barrier, transepithelial electrical resistance (TEER) measurements were  
156 performed at 24-hour intervals for five days. TEER is a well characterized method used to  
157 quickly access barrier function characterized by the rise in the electrical resistance over a cell  
158 monolayer. Similar to our previous observations (33), normoxic cells reached a polarized state  
159 and acquired a fully functional barrier function within 4-5 days post-seeding (Figure 1A).  
160 However, T84 cells cultured under hypoxic conditions established their barrier function  
161 significantly faster compared to cells under normoxic conditions, reaching a polarized state  
162 within two days post-seeding (Figure 1A). To further assess paracellular permeability and the  
163 integrity of the IEC-monolayer, the diffusion of fluorescein isothiocyanate (FITC)-labeled  
164 dextran across the epithelial monolayer was measured (Figure 1B). In this assay, when cells  
165 are non-polarized, dextran added to the apical chamber of a transwell insert is able to rapidly  
166 diffuse to the basal compartment. However, upon cellular polarization and creation of a tight  
167 barrier, the FITC-dextran is retained in the apical chamber. Results show that similar to the  
168 rapid increase in TEER measurements, T84 cells grown under hypoxic conditions are able to

169 more quickly control FITC-dextran diffusion from the apical into the basal compartment of the  
170 transwell. This indicates that a tight barrier function has been achieved faster under hypoxia  
171 compared to normoxia (Figure 1B). This increase in barrier function was rapid and was already  
172 apparent at one day post-seeding. To determine whether the increase in the rate of  
173 polarization and barrier formation was also apparent at the level of the tight junction belt, T84  
174 cells were seeded onto transwell inserts and the formation of tight junctions was monitored  
175 by indirect immunofluorescence of ZO-1 and by qPCR for the tight and adherens junction  
176 proteins E-Cadherin (CDH1), occludin (OCLN) and junctional adhesion molecule 1 (F11R/JAM-  
177 A). Results show that similar to the TEER and dextran diffusion assay, cells cultured under  
178 hypoxic conditions already showed, within one day of seeding, a well-defined tight junction  
179 belt characterized by the classical cobblestone pattern. On the contrary, cells grown under  
180 normoxic conditions did not have well defined tight junctions one day post seeding and this  
181 coincided with the presence of dispersed ZO-1 protein in the cytosol of the cells (Figure 1C).  
182 Additionally, mRNA expression of the junction proteins E-cadherin, occludin and JAM-A was  
183 increased under hypoxia. E-cadherin showed a higher induction initially after hypoxic culture,  
184 while occludin and JAM-A required a prolonged treatment under hypoxia to show increases  
185 in their expression (Figure 1D). All together these results suggest that hypoxia favors the  
186 establishment of barrier function in T84 cells.

187 **Increased barrier formation induced by hypoxia is HIF-1 $\alpha$  dependent.** The main transcription  
188 factor involved in cellular response following changes in oxygenation is the hypoxia-inducible  
189 factor 1 $\alpha$  (HIF-1 $\alpha$ ). To address whether the phenotype of faster barrier establishment under  
190 hypoxia was dependent on the activation of HIF1- $\alpha$ , we aimed at mimicking the hypoxic  
191 conditions using the pharmacological HIF-1 $\alpha$  activator Dimethylxaloylglycine (DMOG).  
192 DMOG exerts its function by inhibiting prolylhydroxylases (PHDs), which under normoxic



193 conditions induce degradation of HIF-1 $\alpha$  (31). Therefore, DMOG treatment of normoxic cells  
194 stabilizes HIF-1 $\alpha$  allowing for its translocation to the nucleus and production of HIF-responsive  
195 elements (HRE) dependent gene expression (Figure 2A). To confirm that DMOG was capable  
196 of stabilizing HIF-1 $\alpha$  in T84 cells, cells were treated with DMOG and the transcriptional  
197 upregulation of the archetypical HIF-1 $\alpha$ -target proteins vascular endothelial growth factor  
198 (VEGF) and carbonic anhydrase 9 (CA9) were assessed by qPCR. Results show that, similar to  
199 hypoxic treatment (Supp. Figure 1A), DMOG treatment results in the significant upregulation  
200 of both VEGF and Ca9 (Suppl. Figure 1B). To determine whether HIF-1 $\alpha$  upregulation leads to  
201 the observed increase in the rate of barrier formation, T84 cells were seeded onto transwell  
202 inserts and incubated under normoxic conditions in the presence or absence of DMOG. The  
203 barrier function was assessed by monitoring TEER in 24-hour intervals over a five-day time  
204 course. In line with our previous observations, DMOG treated cells established their barrier  
205 function faster than the solvent-treated control cells (Figure 2B). To further confirm that the  
206 observed phenotype was HIF-1 $\alpha$  dependent, HIF-1 $\alpha$  was knocked-down by lentiviral  
207 transduction of shRNAs (Figure 2A). Quantification of HIF-1 $\alpha$  knockdown efficiency revealed a  
208 75% reduction of HIF-1 $\alpha$  mRNA compared to cells expressing a scrambled shRNA control  
209 (shScrambled) (Supp. Figure 1C). Knockdown of HIF-1 $\alpha$  abolished the faster barrier formation  
210 under hypoxic conditions, as seen by similar TEER values under normoxic and hypoxic  
211 conditions (Figure 2C). Interestingly, cells expressing the shRNA exhibited a slower barrier  
212 formation in comparison to scrambled shRNA expressing cells even under normoxic  
213 conditions, revealing a general dependency of barrier formation on HIF-1 $\alpha$  even in normal  
214 oxygen levels (Figure 2C). These results strongly suggest that faster establishment of barrier  
215 function in T84 cells observed under hypoxic conditions is HIF-1 $\alpha$  dependent.

216 **Whole transcriptome miRNA profiling reveals regulation of several miRNAs which are**  
217 **involved in barrier formation.** Since significant differences in the barrier state between  
218 hypoxic and normoxic conditions could be observed already 24 hours after seeding, we  
219 hypothesized that the very fast changes in protein expression and barrier establishment must  
220 occur within hours after exposure of the cells to hypoxic conditions. Several proteins (21, 23)  
221 have been shown to contribute to mucosal repair and barrier formation in intestinal cells, but  
222 the role of miRNAs in finetuning gene expression involved in barrier formation has recently  
223 become appreciated (34). So far, most of these studies have only been conducted under  
224 normoxic conditions, hence overlooking the physiological hypoxic conditions of the gut. To  
225 directly address the role of miRNAs in regulating barrier functions of IECs under low oxygen  
226 conditions, miRNAome microarray analysis was employed for cells incubated under normoxic  
227 or hypoxic conditions. This allowed us to broadly screen hypoxia-regulated miRNAs, so called  
228 hypoxamiRs. By comparing the miRNA expression patterns from normoxic and hypoxic  
229 conditions we could identify a total of 108 differentially regulated hypoxamiRs of which 65  
230 were up- and 43 were downregulated under hypoxic conditions (Figure 3A). Detailed analysis  
231 of hypoxamiRs expression revealed that upon hypoxic exposure, T84 cells highly upregulate  
232 miRNA-210-3p expression (Figure 3A). This miRNAs is a master-regulator for adaptation to low  
233 oxygen concentration (27) and is a well characterized hypoxamiRs for which expression is  
234 strongly linked to hypoxic conditions. This upregulation of miRNA-210-3p strongly suggests  
235 that T84 cells have established a hypoxia-specific transcription profile. To probe for miRNAs,  
236 which could regulate barrier function, we performed KEGG and MetaCore-driven pathway  
237 analysis allowing us to identify three potential hypoxamiRs involved in barrier function  
238 establishment (miRNA-320a, miRNA-34a-5p and miRNA-16-5p) (Figure 3B and Supp. Figure 2).  
239 miRNA-320a has been shown to be crucial for intestinal barrier integrity through modulation

240 of the regulatory subunit PPP2R5B of phosphatase PP2A (35). Additionally, miRNA-320a was  
241 found to both target  $\beta$ -catenin directly (36) and VE-cadherin through inhibition of the  
242 transcriptional repressor TWIST1 (37, 38). miRNA-34a-5p has been shown to serve as an  
243 inhibitor for the zinc-finger transcription factor Snail (39, 40), which in turn functions as a  
244 transcriptional repressor of the adherens and tight junction proteins E-Cadherin, claudins and  
245 occludin (41–43). Interestingly, we recently (44) determined that miRNA-16-5p acts as a  
246 regulator of claudin-2 expression and its expression negatively correlated with occurrence of  
247 IBS in patients, therefore playing a key role in modulating barrier function.

248 To validate the results of the miRNA microarray profiling, we performed qRT-PCR  
249 analysis for these specific miRNAs. As observed in our microarray approach, miRNA-210-3p,  
250 miRNA-320a, miRNA-34a-5p and miRNA-16-5p were upregulated under hypoxic conditions in  
251 T84 cells 24- or 48-hours post-seeding (Figure 4A). Since T84 cells are immortalized cells  
252 derived from carcinoma, they may show altered gene regulation, protein expression and  
253 signaling pathways. To verify that the observed hypoxia-dependent upregulation of barrier  
254 function related miRNAs was not an artefact of the cancerogenic nature of the T84 cells, stem  
255 cell-derived primary intestinal epithelial cells, so called human mini-gut organoids, were  
256 employed. Organoids are primary cell cultures and thereby retain key features like structural  
257 architecture and all major cell lineages present in the inner lining of the gut, hence mimicking  
258 the physiological organization of the human gut epithelium *in vivo* (45). In line with the results  
259 found in T84 cells, qRT-PCR confirmed upregulation of all four tested targets under hypoxic  
260 conditions 24- or 48-hours post-seeding in our human intestinal organoids (Figure 4B). Our  
261 observations made both in immortalized carcinoma derived cell lines and in primary human  
262 IECs therefore confirm the increased expression of the hypoxamiRs miRNA-320a, miRNA-34a-  
263 5p and miRNA-16-5p under hypoxic conditions in the human intestinal epithelial cells.

264 **Overexpression of miRNA-320a and miRNA-16-5p induces faster barrier formation in T84**  
265 **cells.** Our above results indicate that miRNA-320a, miRNA-34a-5p and miRNA-16-5p are  
266 upregulated under hypoxic conditions. To directly validate that these hypoxamiRs are  
267 responsible for the observed improved barrier function under hypoxia, we stably  
268 overexpressed these miRNAs in T84 cells by lentiviral transduction. Following confirmation of  
269 their overexpression using qRT-PCR (Suppl. Figure 3), miRNA overexpressing T84 cells were  
270 seeded on transwell inserts and their barrier formation was monitored by TEER measurements  
271 in 24-hour intervals (Figure 5). Results show that miRNA-320a overexpressing cells exhibited  
272 a significantly faster barrier formation in comparison to scrambled miRNA expressing cells.  
273 miRNA-16-5p over expressing cells also showed a slight but non-significant increase in barrier  
274 formation as compared to scrambled miRNA expressing cells. miRNA-34a-5p expressing cells  
275 showed no alteration in barrier formation compared to scrambled miRNA cells, even though  
276 they displayed the highest overexpression levels (Figure 5 and Suppl. Figure 3). Taken  
277 together, these data provide direct evidence for a key role of miRNA-320a in regulating barrier  
278 function in intestinal epithelial cells.

279 **Inhibition of miRNA-320a expression diminishes barrier formation in T84 cells.** To confirm  
280 the role of miRNA-320a in increasing barrier formation under hypoxic conditions, we  
281 generated T84 cells expressing a miRNA-320a-sponge. We confirmed through qPCR that these  
282 cells have a downregulation of miRNA-320a as the sponge binds to the miRNA and blocks its  
283 function (Suppl Figure 4). In line with our previous results, T84 cells expressing a miRNA-320a  
284 sponge displayed a slower establishment of barrier function in comparison to scrambled  
285 transduced cells under both normoxic and hypoxic conditions (Figure 6A). The effect was much  
286 more prominent under hypoxic conditions, decreasing the rate of barrier formation to the  
287 level of normoxic scrambled cells, thereby abolishing the hypoxia-dependent miRNA-320a

288 driven barrier establishment. To confirm the role of miRNA-320a in regulating barrier function,  
289 T84 cells over expressing miRNA-320a or depleted of miRNA-320a were seeded on transwell  
290 inserts and their barrier integrity was monitored using the FITC-dextran diffusion assay. In line  
291 with our previous results, miRNA-320a overexpressing cells show a reduced flux of FITC-  
292 dextran to the basal compartment of the transwell chamber, while cells depleted of miRNA-  
293 320a show an increased flux compared to scrambled miRNA cells (Figure 6B). Taken together,  
294 these findings strongly suggest a model where hypoxia-induced expression of miRNA-320a  
295 directly regulates the establishment of a functional barrier in the epithelial cells lining our  
296 gastrointestinal tract.

## 297 **Discussion**

298 In this work, we demonstrate that the physiological hypoxic environment improves  
299 intestinal epithelial barrier function of T84 cells as shown by the faster establishment of  
300 transepithelial electrical resistance, by the more rapid decrease in barrier permeability to  
301 FITC-dextran, as well as by the faster establishment of the tight junction belt compared to  
302 normoxic conditions. Using pharmacological inhibitor and knock-down approaches, we could  
303 show that this increased barrier function is dependent on the hypoxia regulator HIF-1 $\alpha$ .  
304 Additionally, using a miRNA microarray approach we identified miRNA-320a as a key miRNA  
305 induced under hypoxia being directly responsible for regulating barrier functions in human  
306 intestinal epithelial cells. We could demonstrate that its overexpression is sufficient to  
307 promote barrier function in epithelial cells while interfering with its expression under hypoxic  
308 conditions counteracts the hypoxia-mediated barrier formation establishment. Together our  
309 results show that miRNA-320a is a hypoxia-induced miRNA which plays a key role in regulating  
310 barrier function in human intestinal epithelial cells.

311 The importance of hypoxic conditions in regulating barrier function in intestinal  
312 epithelial cells has been previously studied and several potential mechanisms highlight the  
313 central role of the transcription factor HIF. It was shown that specific shRNA-mediated knock-  
314 down of HIF-1 $\beta$  in T84 and Caco-2 cells resulted in the decrease of claudin-1 expression on  
315 mRNA and protein level accompanied by defects in barrier function and abnormal morphology  
316 of tight junctions (46). This is thought to be a direct effect from the HIFs themselves as HIF  
317 responsive elements have been identified in the promoter region of claudin-1 (46).

318 One of the best characterized means by which hypoxia induces barrier formation  
319 involves the HIF-dependent expression of the intestinal trefoil factor (TFFs). The trefoil factor  
320 family consists of three peptides: TFF1, TFF2 and TFF3; all three are widely distributed in the  
321 gastrointestinal tract and are present in virtually all mucosal membranes (47). Recently, TFFs  
322 have been shown to induce a stabilizing effect on mucosal mucins (22). Additionally, the Van-  
323 Gogh-like protein 1 (Vangl1) was identified as a downstream effector of TFF3 and described  
324 to mediate wound healing in IECs, thereby promoting recovery of barrier function under  
325 condition of local loss of epithelium integrity (23). Importantly, TFF3 also regulates the  
326 expression of tight junctions and adherens junctions in IECs by elevating the levels of claudin-  
327 1 and downregulating the expression of E-cadherin (24). This further activates the  
328 phosphatidylinositol 3-kinase (PI3K)-Akt signaling pathway, which leads to an increase in  
329 barrier function and altered proliferation of cells in the intestinal epithelium (25, 48).  
330 Extensions of these studies *in vivo* revealed the protective role of TFFs on intestinal  
331 permeability and barrier function, as both administration of TFFs as well as administration of  
332 a novel prolyl hydroxylase (PHD) inhibitor (FG-4497) were protective and had a beneficial  
333 influence on clinical symptoms (weight loss, colon length, tissue TNF $\alpha$ ) in a mouse colitis  
334 model (49, 50). Correspondingly, HIF-1 $\alpha$  was found to be highly expressed in Crohn's Disease

335 and ulcerative colitis patients (51) and seems to play a protective role in inflammatory bowel  
336 disorders through improvement of epithelial barrier function (52). It has been suggested that  
337 HIF-1 $\alpha$  helps to control intestinal inflammation by interacting with the inflammation  
338 transcription factor nuclear factor-kappa B (NF- $\kappa$ B) (53).

339 To date, most of the work aimed at understanding the effect of hypoxia on barrier  
340 function in the gut has focused on the transcripts and proteins that are induced under hypoxia.  
341 In the emerging field of miRNA, several miRNAs have been identified as potential regulators  
342 of barrier function. However, to the best of our knowledge, these miRNAs were not studied  
343 under hypoxic conditions but in normal cell culture conditions or in patient samples with  
344 inflammatory diseases. For example, McKenna *et al.* demonstrated that claudin-4 and  
345 claudin-7 were not expressed in the apical membrane of intestinal epithelial cells in Dicer 1-  
346 deficient mice, resulting in impaired intestinal barrier function thus strongly supporting the  
347 importance of miRNA regulation in barrier formation (54). Additionally, overexpression of  
348 miRNAs has been linked to a regulation of barrier function in intestinal epithelial cells (35, 55).  
349 miRNA-31 was found to increase the TEER by decreasing the transepithelial permeability  
350 through interaction with tumor necrosis factor superfamily member 15 (TNFSF15) in Caco2-  
351 BBE cells (56). Of note, TNFSF15 is a well-known risk gene involved in the pathogenesis of  
352 irritable bowel syndrome (IBS) and inflammatory bowel disease (57, 58). hsa-miRNA-26b was  
353 found to regulate the Ste20-like proline/alanine rich kinase (SPAK) involved in epithelial  
354 barrier integrity (59) and overexpression of miRNA-21 in patients with ulcerative colitis has  
355 been associated with the impaired intestinal epithelial barrier function through targeting the  
356 Rho GTPase RhoB (60). We recently identified miRNA-16 and miRNA-125b, as being  
357 downregulated in patients suffering from IBS with diarrhea and determined that these two  
358 miRNAs modulated the tight junction proteins claudin-2 and cingulin (44).

359            Similar to our work, miRNA-320a was previously reported to play a role in barrier  
360 function under normoxic conditions. Cordes et *al.* could show a functional role of miRNA-320a  
361 in stabilizing the intestinal barrier function through reinforcement of barrier integrity in T84  
362 cells and in a murine colitis model (35). They suggest that this is due to a potential modulation  
363 of the tight junction complex during intestinal inflammation. However, they did not address  
364 how different oxygen concentration could influence expression of this hypoxamiR. Our miRNA  
365 expression profiling showed an upregulation in all members of the miRNA-320 family under  
366 hypoxic conditions. We further demonstrate that, as a result of the induced expression of  
367 miRNA-320, hypoxic conditions favor barrier function of intestinal epithelial cells. As such we  
368 propose that the hypoxic environment present in the lumen of the gut impacts barrier  
369 functions not only via direct HIF-mediated regulation of tight junction and adherens proteins  
370 expression but also through a miRNA-based regulation of cell-cell contact formation.

371            To conclude, our work further emphasizes the importance of studying intestinal  
372 epithelial cells in their physiological environment. On the one hand, hypoxia directly influences  
373 the cell biology of the mucosal layer by regulating cell to cell contact, migration, stem-cellness  
374 and metabolism. On the other hand, a low oxygen concentration is critical for the  
375 establishment and maintenance of a stable microbiota. As such, given the growing interests  
376 in understanding both host/commensal interactions in health and diseases and the complex  
377 interplay between host and pathogens in the gastrointestinal tract, it is critical to integrate  
378 the impact of local oxygen concentration and fluctuation in regulating/altering these  
379 molecular processes.

380



381 **Acknowledgements**

382 This work was supported by a research grant from Chica and Heinz Schaller Foundation and  
383 Deutsche Forschungsgemeinschaft (DFG) in SFB1129 (Project 14) to SB. This project has  
384 received funding from the European Union's Seventh Framework Programme under grant  
385 agreement no 334336 (FP7-PEOPLE-2012-CIG). MS was supported by the Brigitte-  
386 Schlieben Lange Program from the state of Baden Württemberg, Germany and the Dual  
387 Career Support from CellNetworks, Heidelberg, Germany. We would like to thank the lab of  
388 Hanno Glimm, NCT, Heidelberg for intestinal tissue samples, Himanshu Soni and Björn Tews  
389 for providing the HIF-1a shRNA lentivirus construct and the Genomics and Proteomics core  
390 facility of the German Cancer Research Center for their preparation and processing of the  
391 miRNA microarray samples.

392 **Material & Methods:**

393 **Cell Lines.** T84 human colonic adenocarcinoma cells (ATCC CCL-248) were cultured in GibCo's  
394 Dulbecco's Modified Eagle Medium/F-12 Nutrient Mixture (1:1), supplemented with 10 %  
395 fetal bovine serum (FBS), 100 U/mL penicillin and 100 µg/mL streptomycin (GibCo) in collagen  
396 coated T25 cell culture flasks. The cells were kept in a constant humid atmosphere containing  
397 37°C, 5% CO<sub>2</sub> and either 21% oxygen (normoxia) or 1% oxygen (hypoxia). HEK293T human  
398 embryonic kidney cells (ATCC CRL 3216) and cultured in Iscove's modified Dulbecco's medium  
399 supplemented with 10% FBS and 100 U/mL penicillin and 100 µg/mL streptomycin. Cells were  
400 grown at 37°C in a humidified atmosphere containing 5% CO<sub>2</sub>. Human intestinal epithelial  
401 organoids were isolated from biopsy tissue provided by the University Hospital Heidelberg as  
402 described before (61). This study was carried out in accordance with the recommendations of  
403 the University Hospital Heidelberg with written informed consent from all subjects in  
404 accordance with the Declaration of Helsinki. All samples were received and maintained in an  
405 anonymized manner. The protocol was approved by the "Ethics commission of the University  
406 Hospital Heidelberg" under the protocol S-443/2017. In short, resected intestinal tissue was  
407 incubated with 2 mM EDTA in PBS for 1 hour at 4°C. Intestinal crypts containing the Lgr5+ stem  
408 cell niche were isolated after 2 mM EDTA treatment, washed with ice cold PBS and  
409 resuspended in Matrigel. The Matrigel was then overlaid with basal medium (Advanced  
410 DMEM/F12, supplemented with 1% penicillin/streptomycin, 10 mM HEPES, 50% v/v L-WRN  
411 conditioned media (ATCC #CRL-3276, expressing Wnt3A, R-spondin and Noggin), 1x B-27 (Life  
412 technology), 1x N-2 (Life technology), 2 mM GlutaMax (Gibco), 50 ng/mL EGF (Invitrogen),  
413 1 mM *N*-acetyl-cysteine (Sigma), 10 mM nicotinamide (Sigma), 10 µM SB202190 (Tocris  
414 Bioscience) and 500 nM A-83-01 (Tocris)) and cultured at 37°C, 5% CO<sub>2</sub> and 21% or 1% oxygen.

415 **Antibodies/Reagents.** Mouse monoclonal antibody against ZO-1 (Invitrogen #339100) was  
416 used at a 1/100 dilution for immunostaining. Secondary antibodies were conjugated with  
417 AF568 (Molecular Probes) and directed against the animal source. ProLong Gold Antifade  
418 containing DAPI was obtained from Thermo Fisher Scientific. 4 kDa FITC-labelled dextran and  
419 Dimethylxalylglycine (DMOG) was obtained from Sigma-Aldrich.

420 **Monitoring Transepithelial Electrical Resistance.** To monitor barrier function,  $1 \times 10^5$  T84 cells  
421 were grown on transwell filters (6.5 mm polycarbonate membrane, 3  $\mu\text{m}$  pore size; Corning).  
422 The medium was changed one day post seeding and subsequently every second day.  
423 Transepithelial resistance was measured with the EVOM<sup>2</sup> chopstick electrode. T84 cells were  
424 considered to have a completely formed barrier when being also fully polarized. Full  
425 polarization in our setting was reached with a TEER of 1000  $\Omega$  (33). Taking into account the  
426 surface of the membrane, reaching a value of 330  $\Omega \cdot \text{cm}^2$  indicated full barrier function (62).

427 **Fluorescent flux assay using fluorescein isothiocyanate (FITC)-labeled dextran.**  $1 \times 10^5$  T84  
428 cells were grown on collagen coated transwell filters under normoxic and hypoxic conditions.  
429 Every 24 hours, 2 mg/mL FITC-labelled dextran was added to the apical compartment and  
430 media was collected from the basal compartment three hours post-treatment. Increase of  
431 fluorescence in the basal media was measured with the FLUOstar Omega spectrofluorometer  
432 (BMG Labtech) at an excitation wavelength of 495 nm and an emission wavelength of 518 nm.  
433 As a positive control, the fluorescence of a 100  $\mu\text{L}$  aliquot of a collagen coated but cell-free  
434 transwell filter was measured to assess maximum diffusion of FITC-labeled dextran.

435 **Immunofluorescence staining.**  $1 \times 10^5$  T84 cells were grown on transwell filters. At the  
436 indicated times post-seeding, the polycarbonate membrane was removed from the transwell  
437 holder, rinsed once in PBS and fixed in 2% PFA for 20 min. PFA was removed, cells were washed

438 3x with PBS and permeabilized with 0.5% Triton X-100 (v/v) at RT for 15 min. After blocking  
439 with 3% BSA-PBS for 1 hour at RT, cells were incubated with primary antibody against ZO-1 in  
440 3% BSA-PBS for 1 hour at RT. Cells were then washed with 0.1% Tween-20-PBS (v/v) followed  
441 by incubation with the secondary goat anti-mouse Alexa 568 antibody diluted in 1% BSA at RT  
442 for 45 min. After 45 min, cells were subjected to 3x washing with 0.1% Tween-20-PBS. The  
443 membrane was then briefly rinsed in Millipore H<sub>2</sub>O and mounted onto glass slides using  
444 ProLong Gold Antifade reagent with DAPI. Samples were imaged on a Nikon Eclipse Ti-S  
445 inverted microscope using a 40x oil objective.

446 **RNA Isolation, cDNA, and qPCR.** Total RNA was purified from lysed T84 colonic  
447 adenocarcinoma cells or intestinal organoids using the NucleoSpin RNA extraction kit by  
448 Marchery-Nagel following the manufacturer's instruction. 100-250 ng total RNA was reversed  
449 transcribed into cDNA using the iScript cDNA Synthesis kit as per manufacturer's instruction  
450 (BioRad Laboratories). qRT-PCR was performed using the Bio-Rad CFX96 Real-Time PCR  
451 Detection System and SsoAdvanced Universal SYBR Green Supermix (Bio-Rad). The data was  
452 analyzed with the Bio-Rad CFX Manager 3.0, using the housekeeping gene HPRT1 for  
453 normalization. Expression of E-Cadherin, occludin, Jam-A, VEGF and CA9 were analyzed using  
454 specific primers for the respective human sequence. The expression levels of the investigated  
455 genes were calculated as  $\Delta\Delta C_q$ , normalizing to normoxic control samples and to the  
456 normalizing genes.

457 **Table 1:** Primer Sequences qRT-PCR

| Primer        | Sequence             |
|---------------|----------------------|
| CA9 fw        | AGGATCTACCTACTGTTGAG |
| CA9 rev       | TGGTCATCCCCTTCTTTG   |
| E-Cadherin fw | CCGAGAGCTACACGTTT    |

|                |                         |
|----------------|-------------------------|
| E-Cadherin rev | TCTTCAAATTCACCTCTGCC    |
| JAM-A fw       | AAGGGACTTCGAGTAAGAAG    |
| JAM-A rev      | AAGGCAAATGCAGATGATAG    |
| HPRT1 fw       | CCTGGCGTCGTGATTAGTGAT   |
| HPRT1 rev      | AGACGTTTCAGTCCTGTCCATAA |
| occludin fw    | GGACTGGATCAGGGAATATC    |
| occludin rev   | ATTCTTTATCCAAACGGGAG    |
| VEGF fw        | CTACCTCCACCATGCCAAGT    |
| VEGF rev       | AGCTGCGCTGATAGACATCC    |

458

459 **miRNA microarray.** Expression of miRNA's under normoxic and hypoxic conditions was  
460 analyzed by extracting total RNA including miRNA using the miRNeasy Mini Kit by Qiagen  
461 according to the manufacturer's instructions. Microarray analysis was performed using the  
462 Agilent human miRNA v21 microarray chip. Quantile normalized miRNA expression values  
463 were log2-transformed and differentially expressed miRNAs between experimental conditions  
464 were identified using the empirical Bayes approach based on moderated t-statistics as  
465 implemented in the Bioconductor package limma. P-values were adjusted for multiple testing  
466 using the Benjamini-Hochberg correction to control the false discovery rate. Adjusted p-values  
467 below 5% were considered statistically significant. For heatmap display, miRNAs were scaled  
468 across samples, and hierarchical clustering of samples and miRNAs was performed using  
469 euclidean distance and Ward's linkage. Analyses were carried out using R 3.348, with add-on  
470 package pheatmap. Target genes of significantly regulated miRNAs were retrieved from  
471 miRTarBase database v6.1 using Bioconductor package multiMiR (63). Overrepresentation of  
472 KEGG pathways was tested with limma functions kegg and goana. P-values were adjusted for  
473 multiple testing using the Benjamini-Hochberg correction. Subsequent pathway analysis was  
474 performed using the MetaCore™ software.

475 **miRNA validation.** For further validation of miRNA-210-3p, miRNA-320a, miRNA-34a-5p and  
476 miRNA-16-5p, total RNA including miRNA was transcribed into cDNA using the miScript II RT  
477 Kit (Qiagen). After cDNA-synthesis, qRT-PCR was performed using the miScript SYBR® Green  
478 PCR Kit (Qiagen) and the respective miScript Primer Assays (Qiagen) on the Bio-Rad CFX96  
479 Real-Time PCR Detection System, normalizing to RNU6-2 as a housekeeping snRNA. The fold  
480 of expression of the investigated miRNAs were calculated as  $\Delta\Delta Cq$ , normalizing to normoxic  
481 control samples and to the housekeeping snRNA.

#### 482 **Production of lentiviral constructs expressing miRNAs and shRNA against HIF-1 $\alpha$ .**

483 Oligonucleotides encoding the sequence for mature miRNA-16-5p, miRNA-34a-5p, and  
484 miRNA-320a were designed according to protocol “Lentiviral Overexpression of miRNAs” (64),  
485 oligonucleotides encoding the sequence for HIF-1 $\alpha$  knockdown were designed from the TRC  
486 library, cloneID: TRCN0000003808 (Table 2). Annealed oligonucleotides were ligated with the  
487 AgeI-HF and EcoRI-HF digested pLKO.1 puro vector (Addgene #8453) using the T4 DNA Ligase  
488 (New England Biolabs) and the resulting plasmids were transformed into *E. coli* DH5 $\alpha$ -  
489 competent cells. Amplified plasmid DNA was purified using the NucleoBondR PC 100 kit by  
490 Marchery-Nagel following the manufacturer’s instruction.

491 **Table 2:** Oligonucleotides for shRNA and miRNA expression. Bold characters mark the  
492 respective target or miRNA sequence.

| Name         | Sequence                                                                        |
|--------------|---------------------------------------------------------------------------------|
| shHIF fw     | CCGG <b>CCGCTGGAGACACAATCATATCTCGAGATATGA</b><br>TTGTGTCTCCAGCGGTTTTTG          |
| shHIF rev    | AATTCAAAA <b>CCGCTGGAGACACAATCATATCTCGAG</b><br>ATATGATTGTGTCTCCAGCGG           |
| MIR-320a fw  | CCGGTCGCCCTCTCAACCCAGCTTTTCTCGAG <b>AAAA</b><br><b>GCTGGGTTGAGAGGGCGATTTTTG</b> |
| MIR-320a rev | AATTCAAAAATCGCCCTCTCAACCCAGCTTTTCTCGA<br><b>GAAAAGCTGGGTTGAGAGGGCGA</b>         |
| MIR-16-5p fw | CCGGCGCCAATATTTACGTGCTGCTACTCGAG <b>TAGC</b>                                    |

|                |                                                                        |
|----------------|------------------------------------------------------------------------|
|                | <b>AGCACGTAATATTGGCGTTTTTG</b>                                         |
| MIR-16-5p rev  | AATTCAAAAACGCCAATATTTACGTGCTGCTACTCGA<br><b>GTAGCAGCACGTAATATTGGCG</b> |
| MIR-34a-5p fw  | CCGGACAACCAGCTAAGACACTGCCACTCGAGTGGC<br><b>AGTGTCTTAGCTGGTTGTTTTTG</b> |
| MIR-34a-5p rev | AATTCAAAAACAACCAGCTAAGACACTGCCACTCGA<br><b>GTGGCAGTGTCTTAGCTGGTTGT</b> |

493

494 **Lentivirus production and selection of stable cell lines.** HEK293T cells were seeded on 10 cm<sup>2</sup>  
495 dishes and allowed to adhere for 2 days. When cells reached 70-80% confluence they were  
496 transfected with 4 µg of pMD2.G (Addgene #12259), 4 µg of psPAX2 (Addgene #12260) and  
497 8 µg of purified pLKO.1 plasmid containing the shRNA or miRNA constructs. Cell supernatant  
498 containing generated lentivirus was harvested 48-72 h post-transfection, filtered through a  
499 45 µM Millex HA-filter (Merck Millipore) and purified by ultracentrifugation at 27,000x g for  
500 three h. For lentiviral transduction, 3x10<sup>5</sup> T84 cells were seeded onto collagen coated 6-well  
501 plates. After 24 h, medium was replaced with 4 mL medium containing 20 µL of the purified  
502 lentivirus or lentivirus encoding the 320a-sponge (MISSION<sup>®</sup> Lenti microRNA Inhibitor,  
503 Human, Sigma, #HLTUD0470). Two to three days after transduction, medium was  
504 supplemented with 10 µg/mL puromycin for selection of successfully transduced cells.

505

506 **References**

- 507 1. König J, Wells J, Cani PD, García-Ródenas CL, MacDonald T, Mercenier A, Whyte J, Troost F,  
508 Brummer R-J. 2016. Human Intestinal Barrier Function in Health and Disease. *Clin Transl*  
509 *Gastroenterol* 7:e196.
- 510 2. Laukoetter MG, Nava P, Nusrat A. 2008. Role of the intestinal barrier in inflammatory bowel  
511 disease. *World J Gastroenterol WJG* 14:401–407.
- 512 3. Groschwitz KR, Hogan SP. 2009. Intestinal barrier function: molecular regulation and disease  
513 pathogenesis. *J Allergy Clin Immunol* 124:3–20; quiz 21–22.
- 514 4. Pitman RS, Blumberg RS. 2000. First line of defense: the role of the intestinal epithelium as an  
515 active component of the mucosal immune system. *J Gastroenterol* 35:805–814.
- 516 5. Muniz LR, Knosp C, Yeretssian G. 2012. Intestinal antimicrobial peptides during homeostasis,  
517 infection, and disease. *Front Immunol* 3:310.
- 518 6. Antoni L, Nuding S, Weller D, Gersemann M, Ott G, Wehkamp J, Stange EF. 2013. Human colonic  
519 mucus is a reservoir for antimicrobial peptides. *J Crohns Colitis* 7:e652-664.
- 520 7. Tsukita S, Furuse M, Itoh M. 2001. Multifunctional strands in tight junctions. *Nat Rev Mol Cell*  
521 *Biol* 2:285–293.
- 522 8. Zihni C, Mills C, Matter K, Balda MS. 2016. Tight junctions: from simple barriers to multifunctional  
523 molecular gates. *Nat Rev Mol Cell Biol* 17:564–580.
- 524 9. Fisher EM, Khan M, Salisbury R, Kuppusamy P. 2013. Noninvasive monitoring of small intestinal  
525 oxygen in a rat model of chronic mesenteric ischemia. *Cell Biochem Biophys* 67:451–459.



- 526 10. Zeitouni NE, Chotikatum S, von Köckritz-Blickwede M, Naim HY. 2016. The impact of hypoxia on  
527 intestinal epithelial cell functions: consequences for invasion by bacterial pathogens. *Mol Cell*  
528 *Pediatr* 3:14.
- 529 11. Albenberg L, Esipova T, Judge C, Bittinger K, Chen J, Laughlin A, Grunberg S, Baldassano R, Lewis  
530 J, Li H, Thom S, Bushman F, Vinogradov S, Wu G. 2014. Correlation Between Intraluminal Oxygen  
531 Gradient and Radial Partitioning of Intestinal Microbiota in Humans and Mice. *Gastroenterology*  
532 147:1055-1063.e8.
- 533 12. Taylor CT, Colgan SP. 2007. Hypoxia and gastrointestinal disease. *J Mol Med* 85:1295–1300.
- 534 13. Zheng L, Kelly CJ, Colgan SP. 2015. Physiologic hypoxia and oxygen homeostasis in the healthy  
535 intestine. A Review in the Theme: Cellular Responses to Hypoxia. *Am J Physiol Cell Physiol*  
536 309:C350-360.
- 537 14. Dengler VL, Galbraith M, Espinosa JM. 2014. Transcriptional Regulation by Hypoxia Inducible  
538 Factors. *Crit Rev Biochem Mol Biol* 49:1–15.
- 539 15. Kaelin WG, Ratcliffe PJ. 2008. Oxygen sensing by metazoans: the central role of the HIF  
540 hydroxylase pathway. *Mol Cell* 30:393–402.
- 541 16. Ivan M, Kondo K, Yang H, Kim W, Valiando J, Ohh M, Salic A, Asara JM, Lane WS, Kaelin WG. 2001.  
542 HIFalpha targeted for VHL-mediated destruction by proline hydroxylation: implications for O<sub>2</sub>  
543 sensing. *Science* 292:464–468.
- 544 17. Schofield CJ, Ratcliffe PJ. 2004. Oxygen sensing by HIF hydroxylases. *Nat Rev Mol Cell Biol* 5:343–  
545 354.
- 546 18. Semenza GL. 2014. Oxygen sensing, hypoxia-inducible factors, and disease pathophysiology.  
547 *Annu Rev Pathol* 9:47–71.

- 548 19. Greijer AE, van der Groep P, Kemming D, Shvarts A, Semenza GL, Meijer GA, van de Wiel MA,  
549 Belien J a. M, van Diest PJ, van der Wall E. 2005. Up-regulation of gene expression by hypoxia is  
550 mediated predominantly by hypoxia-inducible factor 1 (HIF-1). *J Pathol* 206:291–304.
- 551 20. Fiocchi C. 1996. Cytokines in inflammatory bowel disease. R.G. Landes ; North American  
552 distributor, Chapman & Hall, Austin; New York.
- 553 21. Furuta GT, Turner JR, Taylor CT, Hershberg RM, Comerford K, Narravula S, Podolsky DK, Colgan  
554 SP. 2001. Hypoxia-inducible factor 1-dependent induction of intestinal trefoil factor protects  
555 barrier function during hypoxia. *J Exp Med* 193:1027–1034.
- 556 22. Tomasetto C, Masson R, Linares J, Wendling C, Lefebvre O, Chenard M, Rio M. 2000. pS2/TFF1  
557 interacts directly with the VWFC cysteine-rich domains of mucins. *Gastroenterology* 118:70–80.
- 558 23. Kalabis J, Rosenberg I, Podolsky DK. 2006. Vangl1 protein acts as a downstream effector of  
559 intestinal trefoil factor (ITF)/TFF3 signaling and regulates wound healing of intestinal epithelium.  
560 *J Biol Chem* 281:6434–6441.
- 561 24. Meyer zum Büschenfelde D, Tauber R, Huber O. 2006. TFF3-peptide increases transepithelial  
562 resistance in epithelial cells by modulating claudin-1 and -2 expression. *Peptides* 27:3383–3390.
- 563 25. Sun Z, Liu H, Yang Z, Shao D, Zhang W, Ren Y, Sun B, Lin J, Xu M, Nie S. 2014. Intestinal trefoil  
564 factor activates the PI3K/Akt signaling pathway to protect gastric mucosal epithelium from  
565 damage. *Int J Oncol* 45:1123–1132.
- 566 26. Loscalzo J. 2010. The cellular response to hypoxia: tuning the system with microRNAs. *J Clin Invest*  
567 120:3815–3817.
- 568 27. Chan YC, Banerjee J, Choi SY, Sen CK. 2012. miR-210: the master hypoxamir. *Microcirc N Y N* 1994  
569 19:215–223.

- 570 28. Winter J, Jung S, Keller S, Gregory RI, Diederichs S. 2009. Many roads to maturity: microRNA  
571 biogenesis pathways and their regulation. *Nat Cell Biol* 11:228–234.
- 572 29. He L, Hannon GJ. 2004. MicroRNAs: small RNAs with a big role in gene regulation. *Nat Rev Genet*  
573 5:522–531.
- 574 30. Tili E, Michaille J-J, Piurowski V, Rigot B, Croce CM. 2017. MicroRNAs in intestinal barrier function,  
575 inflammatory bowel disease and related cancers—their effects and therapeutic potentials. *Curr*  
576 *Opin Pharmacol* 37:142–150.
- 577 31. Cummins EP, Seeballuck F, Keely SJ, Mangan NE, Callanan JJ, Fallon PG, Taylor CT. 2008. The  
578 Hydroxylase Inhibitor Dimethylxalylglycine Is Protective in a Murine Model of Colitis.  
579 *Gastroenterology* 134:156-165.e1.
- 580 32. Kanai M, Mullen C, Podolsky DK. 1998. Intestinal trefoil factor induces inactivation of extracellular  
581 signal-regulated protein kinase in intestinal epithelial cells. *Proc Natl Acad Sci U S A* 95:178–182.
- 582 33. Stanifer ML, Rippert A, Kazakov A, Willemsen J, Bucher D, Bender S, Bartenschlager R, Binder M,  
583 Boulant S. 2016. Reovirus intermediate subviral particles constitute a strategy to infect intestinal  
584 epithelial cells by exploiting TGF- $\beta$  dependent pro-survival signaling. *Cell Microbiol* 18:1831–  
585 1845.
- 586 34. Cichon C, Sabharwal H, Rüter C, Schmidt MA. 2014. MicroRNAs regulate tight junction proteins  
587 and modulate epithelial/endothelial barrier functions. *Tissue Barriers* 2:e944446.
- 588 35. Cordes F, Brückner M, Lenz P, Veltman K, Glauben R, Siegmund B, Hengst K, Schmidt MA, Cichon  
589 C, Bettenworth D. 2016. MicroRNA-320a Strengthens Intestinal Barrier Function and Follows the  
590 Course of Experimental Colitis. *Inflamm Bowel Dis* 22:2341–2355.

- 591 36. Sun J-Y, Huang Y, Li J-P, Zhang X, Wang L, Meng Y-L, Yan B, Bian Y-Q, Zhao J, Wang W-Z, Yang A-  
592 G, Zhang R. 2012. MicroRNA-320a suppresses human colon cancer cell proliferation by directly  
593 targeting  $\beta$ -catenin. *Biochem Biophys Res Commun* 420:787–792.
- 594 37. Li C, Duan P, Wang J, Lu X, Cheng J. 2017. miR-320 inhibited ovarian cancer oncogenicity via  
595 targeting TWIST1 expression. *Am J Transl Res* 9:3705–3713.
- 596 38. Sun J, Sun B, Sun R, Zhu D, Zhao X, Zhang Y, Dong X, Che N, Li J, Liu F, Zhao N, Wang Y, Zhang D.  
597 2017. HMGA2 promotes vasculogenic mimicry and tumor aggressiveness by upregulating Twist1  
598 in gastric carcinoma. *Sci Rep* 7:2229.
- 599 39. Kim NH, Kim HS, Li X-Y, Lee I, Choi H-S, Kang SE, Cha SY, Ryu JK, Yoon D, Fearon ER, Rowe RG, Lee  
600 S, Maher CA, Weiss SJ, Yook JI. 2011. A p53/miRNA-34 axis regulates Snail1-dependent cancer  
601 cell epithelial–mesenchymal transition. *J Cell Biol* 195:417–433.
- 602 40. Siemens H, Jackstadt R, Hüntten S, Kaller M, Menssen A, Götz U, Hermeking H. 2011. miR-34 and  
603 SNAIL form a double-negative feedback loop to regulate epithelial-mesenchymal transitions. *Cell*  
604 *Cycle Georget Tex* 10:4256–4271.
- 605 41. Batlle E, Sancho E, Francí C, Domínguez D, Monfar M, Baulida J, García De Herreros A. 2000. The  
606 transcription factor snail is a repressor of E-cadherin gene expression in epithelial tumour cells.  
607 *Nat Cell Biol* 2:84–89.
- 608 42. Cano A, Pérez-Moreno MA, Rodrigo I, Locascio A, Blanco MJ, del Barrio MG, Portillo F, Nieto MA.  
609 2000. The transcription factor snail controls epithelial-mesenchymal transitions by repressing E-  
610 cadherin expression. *Nat Cell Biol* 2:76–83.
- 611 43. Ikenouchi J, Matsuda M, Furuse M, Tsukita S. 2003. Regulation of tight junctions during the  
612 epithelium-mesenchyme transition: direct repression of the gene expression of  
613 claudins/occludin by Snail. *J Cell Sci* 116:1959–1967.

- 614 44. Martínez C, Rodiño-Janeiro BK, Lobo B, Stanifer ML, Klaus B, Granzow M, González-Castro AM,  
615 Salvo-Romero E, Alonso-Cotoner C, Pigrau M, Roeth R, Rappold G, Huber W, González-Silos R,  
616 Lorenzo J, de Torres I, Azpiroz F, Boulant S, Vicario M, Niesler B, Santos J. 2017. miR-16 and miR-  
617 125b are involved in barrier function dysregulation through the modulation of claudin-2 and  
618 cingulin expression in the jejunum in IBS with diarrhoea. *Gut* 66:1537–1538.
- 619 45. Sato T, Clevers H. 2013. Growing self-organizing mini-guts from a single intestinal stem cell:  
620 mechanism and applications. *Science* 340:1190–1194.
- 621 46. Saeedi BJ, Kao DJ, Kitzenberg DA, Dobrinskikh E, Schwisow KD, Masterson JC, Kendrick AA, Kelly  
622 CJ, Bayless AJ, Kominsky DJ, Campbell EL, Kuhn KA, Furuta GT, Colgan SP, Glover LE. 2015. HIF-  
623 dependent regulation of claudin-1 is central to intestinal epithelial tight junction integrity. *Mol*  
624 *Biol Cell* 26:2252–2262.
- 625 47. Aamann L, Vestergaard EM, Grønbaek H. 2014. Trefoil factors in inflammatory bowel disease.  
626 *World J Gastroenterol WJG* 20:3223–3230.
- 627 48. Lin N, Xu L-F, Sun M. 2013. The protective effect of trefoil factor 3 on the intestinal tight junction  
628 barrier is mediated by toll-like receptor 2 via a PI3K/Akt dependent mechanism. *Biochem Biophys*  
629 *Res Commun* 440:143–149.
- 630 49. Kjellef S, Thim L, Pyke C, Poulsen SS. 2007. Cellular localization, binding sites, and pharmacologic  
631 effects of TFF3 in experimental colitis in mice. *Dig Dis Sci* 52:1050–1059.
- 632 50. Robinson A, Keely S, Karhausen J, Gerich ME, Furuta GT, Colgan SP. 2008. Mucosal protection by  
633 hypoxia-inducible factor prolyl hydroxylase inhibition. *Gastroenterology* 134:145–155.
- 634 51. Giatromanolaki A, Sivridis E, Maltezos E, Papazoglou D, Simopoulos C, Gatter KC, Harris AL,  
635 Koukourakis MI. 2003. Hypoxia inducible factor 1 $\alpha$  and 2 $\alpha$  overexpression in inflammatory bowel  
636 disease. *J Clin Pathol* 56:209–213.

- 637 52. Shah YM. 2016. The role of hypoxia in intestinal inflammation. *Mol Cell Pediatr* 3.
- 638 53. D'Ignazio L, Bandarra D, Rocha S. 2016. NF- $\kappa$ B and HIF crosstalk in immune responses. *FEBS J*  
639 283:413–424.
- 640 54. McKenna LB, Schug J, Vourekas A, McKenna JB, Bramswig NC, Friedman JR, Kaestner KH. 2010.  
641 MicroRNAs Control Intestinal Epithelial Differentiation, Architecture, and Barrier Function.  
642 *Gastroenterology* 139:1654-1664.e1.
- 643 55. Chu X-Q, Wang J, Chen G-X, Zhang G-Q, Zhang D-Y, Cai Y-Y. 2018. Overexpression of microRNA-  
644 495 improves the intestinal mucosal barrier function by targeting STAT3 via inhibition of the  
645 JAK/STAT3 signaling pathway in a mouse model of ulcerative colitis. *Pathol Res Pract* 214:151–  
646 162.
- 647 56. Nan X, Qin S, Yuan Z, Li Y, Zhang J, Li C, Tan X, Yan Y. 2016. Hsa-miRNA-31 regulates epithelial cell  
648 barrier function by inhibiting TNFSF15 expression. *Cell Mol Biol Noisy--Gd Fr* 62:104–110.
- 649 57. Gazouli M, Wouters MM, Kapur-Pojškić L, Bengtson M-B, Friedman E, Nikčević G, Demetriou CA,  
650 Mulak A, Santos J, Niesler B. 2016. Lessons learned--resolving the enigma of genetic factors in  
651 IBS. *Nat Rev Gastroenterol Hepatol* 13:77–87.
- 652 58. Jostins L, Ripke S, Weersma RK, Duerr RH, McGovern DP, Hui KY, Lee JC, Schumm LP, Sharma Y,  
653 Anderson CA, Essers J, Mitrovic M, Ning K, Cleylen I, Theatre E, Spain SL, Raychaudhuri S, Goyette  
654 P, Wei Z, Abraham C, Achkar J-P, Ahmad T, Amininejad L, Ananthakrishnan AN, Andersen V,  
655 Andrews JM, Baidoo L, Balschun T, Bampton PA, Bitton A, Boucher G, Brand S, Büning C, Cohain  
656 A, Cichon S, D'Amato M, De Jong D, Devaney KL, Dubinsky M, Edwards C, Ellinghaus D, Ferguson  
657 LR, Franchimont D, Fransen K, Gearry R, Georges M, Gieger C, Glas J, Haritunians T, Hart A,  
658 Hawkey C, Hedl M, Hu X, Karlsen TH, Kupcinskas L, Kugathasan S, Latiano A, Laukens D, Lawrance  
659 IC, Lees CW, Louis E, Mahy G, Mansfield J, Morgan AR, Mowat C, Newman W, Palmieri O,  
660 Ponsioen CY, Potocnik U, Prescott NJ, Regueiro M, Rotter JJ, Russell RK, Sanderson JD, Sans M,

661 Satsangi J, Schreiber S, Simms LA, Sventoraityte J, Targan SR, Taylor KD, Tremelling M, Verspaget  
662 HW, De Vos M, Wijmenga C, Wilson DC, Winkelmann J, Xavier RJ, Zeissig S, Zhang B, Zhang CK,  
663 Zhao H, International IBD Genetics Consortium (IIBDGC), Silverberg MS, Annese V, Hakonarson  
664 H, Brant SR, Radford-Smith G, Mathew CG, Rioux JD, Schadt EE, Daly MJ, Franke A, Parkes M,  
665 Vermeire S, Barrett JC, Cho JH. 2012. Host-microbe interactions have shaped the genetic  
666 architecture of inflammatory bowel disease. *Nature* 491:119–124.

667 59. Yan et al. 2016. Hsa-miRNA-26b regulates SPAK expression during intestinal epithelial cell  
668 differentiation. *Int J Clin Exp Pathol* 9:9821–9836.

669 60. Yang Y, Ma Y, Shi C, Chen H, Zhang H, Chen N, Zhang P, Wang F, Yang J, Yang J, Zhu Q, Liang Y,  
670 Wu W, Gao R, Yang Z, Zou Y, Qin H. 2013. Overexpression of miR-21 in patients with ulcerative  
671 colitis impairs intestinal epithelial barrier function through targeting the Rho GTPase RhoB.  
672 *Biochem Biophys Res Commun* 434:746–752.

673 61. Pervolaraki K, Stanifer ML, Münchau S, Renn LA, Albrecht D, Kurzhals S, Senís E, Grimm D,  
674 Schröder-Braunstein J, Rabin RL, Boulant S. 2017. Type I and Type III Interferons Display Different  
675 Dependency on Mitogen-Activated Protein Kinases to Mount an Antiviral State in the Human  
676 Gut. *Front Immunol* 8:459.

677 62. Guidelines for Use: Transwell® Permeable Supports | Life Sciences | Corning.

678 63. Ru Y, Kechris KJ, Tabakoff B, Hoffman P, Radcliffe RA, Bowler R, Mahaffey S, Rossi S, Calin GA,  
679 Bemis L, Theodorescu D. 2014. The multiMiR R package and database: integration of microRNA-  
680 target interactions along with their disease and drug associations. *Nucleic Acids Res* 42:e133.

681 64. Zöllner H, Hahn SA, Maghnouj A. 2014. Lentiviral overexpression of miRNAs. *Methods Mol Biol*  
682 Clifton NJ 1095:177–190.

683

684 **Figure Legends**

685 **Figure 1:**

686 **Hypoxia improves barrier function in intestinal epithelial cells.** T84 cells were seeded onto  
687 transwell inserts and cultured for the indicated time under normoxic (21% O<sub>2</sub>) or hypoxic  
688 conditions (1% O<sub>2</sub>). (A) Rate of TEER increase over the cell monolayer was measured every 24  
689 hours using the EVOM<sup>2</sup> chopstick electrode. TEER greater than 330 Ohm\*cm<sup>2</sup> indicates  
690 complete barrier formation and is marked with a dotted line (33). (B) Paracellular permeability  
691 of the cell monolayer on transwell inserts was assessed by adding 4 kD FITC-dextran to the  
692 apical compartment (schematic overview left panel). Three hours post-incubation the basal  
693 medium was analyzed for an increase of fluorescence by spectrofluorometry (right panel). (C)  
694 T84 cultured for 24 and 48 hours under normoxic and hypoxic conditions were evaluated for  
695 the expression of the tight junction protein ZO-1 (red). Cell nuclei were stained with DAPI  
696 (blue). Scale bar indicates 25 μm. Representative image shown. (C) RNA samples of normoxic  
697 and hypoxic cultures of T84 were analyzed by qPCR for the expression of tight junction-  
698 proteins E-Cadherin, occludin and JAM-A. (A-B) Values shown represent the mean (+/- SEM)  
699 of N=9 from triplicate experiments. \*\*\*=P < 0.0001 (two-way Anova). (D) Experiments were  
700 performed in quadruplicate. Error bars indicate the standard deviation. \* = P < 0.05, \*\* = < 0.01,  
701 n.s. = not significant (one-sample t-test on log-transformed fold changes).

702

703 **Figure 2:**

704 **HIF-1α is responsible for faster barrier establishment under hypoxic conditions.** (A)  
705 Schematic showing the regulation of the transcription factor HIF-1α at high and low oxygen



706 concentrations. Under normoxic conditions, HIF-1 $\alpha$  is hydroxylated at two specific proline  
707 residues by different prolyl hydroxylases (PHDs), leading to binding to the E3 ubiquitin ligase  
708 containing the von Hippel-Lindau (VHL) tumor suppressor protein. This mediates the  
709 polyubiquitination of HIF-1 $\alpha$  and its downstream proteasomal degradation. Under hypoxic  
710 conditions, degradation is inhibited due to the lack of substrate for the PHDs, therefore  
711 stabilizing HIF-1 $\alpha$ , leading to dimerization with its constitutively expressed  $\beta$ -subunit (HIF-1 $\beta$ )  
712 and subsequent gene expression. Pharmacological activation of HIF-1 $\alpha$ -function by DMOG and  
713 inhibition by shRNA against HIF-1 $\alpha$  mRNA are indicated by red arrows. (B) T84 cells were  
714 seeded on transwell inserts and incubated under normoxic conditions in the presence or  
715 absence of DMOG. TEER measurements were taken in 24-hour intervals for four days. (C) T84  
716 cells depleted of HIF-1 $\alpha$  through shRNA knock-down or expressing a scrambled shRNA were  
717 seeded on transwell inserts. Cells were incubated in normoxic or hypoxic conditions and TEER  
718 measurements were taken in 24-hour intervals for five days. TEER greater than 330 Ohm\*cm<sup>2</sup>  
719 indicates complete barrier formation and is marked with a dotted line (33). (B-C) Values shown  
720 represent the mean (+/- SEM) of N=9 from triplicate experiments. \*= P:0.0417 (two-way  
721 Anova), n.s. = not significant.

722

723 **Figure 3:**

724 **Hypoxia leads to changes in expression of several hypoxamiRs known to regulate barrier**  
725 **function.** T84 cells were seeded on transwell inserts and incubated under hypoxic or normoxic  
726 conditions for 48 hours. miRNA was isolated and evaluated by miRNA microarray. (A-B)  
727 Heatmaps of differentially expressed miRNAs in T84 cells cultured under normoxic and hypoxic  
728 conditions. The color scale shown on the right illustrates the relative expression levels of

729 differentially expressed miRNAs. Orange indicates up-regulated (>0), purple shows down-  
730 regulated miRNAs (<0). (A) Heatmap for 108 differentially regulated hypoxamiRs that were  
731 significantly up- or down-regulated compared to normoxic conditions. Connecting lines in the  
732 cluster dendrogram between up- and downregulated miRNAs were shortened to enable  
733 visualization (indicated by two skewed lines). (B) Heatmap of miRNA-210-3p (positive control  
734 for hypoxic conditions), miRNA-320a, miRNA-34a-5p and miRNA16-5p, identified by pathway  
735 analysis for playing a role in barrier formation. (A-B) Samples were performed in quadruplicate  
736 and the level of expression of each replicate is shown in the heatmap.

737

738 **Figure 4:**

739 **Validation of upregulated hypoxamiRs in carcinoma derived T84 cells and primary human**  
740 **mini-gut organoids.** The expression of miRNA-210-3p (hypoxia control), miRNA-320a,  
741 miRNA-34a-5p and miRNA-16-5p was investigated 24 and 48 hours post transfer to hypoxia  
742 by qRT-PCR in (A) T84 and (B) human primary mini-gut organoids. Data was normalized to  
743 normoxic cells 24 hours post transfer. All experiments were performed in triplicate. Error bars  
744 indicate the standard error (SEM).

745

746 **Figure 5:**

747 **Overexpression of miRNA-320a and miRNA 16-5p induces faster barrier formation in T84**  
748 **cells.** T84 cells stably expressing miRNA-320a, miRNA-16-5p and miRNA-34a-5p by lentiviral  
749 transduction were seeded onto transwell inserts and barrier formation was assessed by TEER  
750 measurement in 24-hour intervals over four days. TEER greater than 330 Ohm\*cm<sup>2</sup> indicates

751 complete barrier formation and is marked with a dotted line (33). Values shown represent the  
752 mean (+/- SEM) of N=6 (miRNA-16-5p & miRNA-34a-5p) or N=12 (miRNA-320a) from triplicate  
753 or quadruplicate experiments, respectively. \*\*\*= P:0.0002 (two-way Anova), n.s. = not  
754 significant.

755

756 **Figure 6:**

757 **Inhibition of miRNA-320a expression diminishes barrier formation in T84 cells.** (A) T84 cells  
758 stably expressing miRNA-320a sponge were seeded onto transwell inserts and barrier function  
759 was assessed by TEER measurements in 24-hours intervals over four days. TEER greater than  
760 330 Ohm\*cm<sup>2</sup> indicates complete barrier formation and is marked with a dotted line (33). (B)  
761 Paracellular permeability of T84 cells overexpressing the miRNA-320a (overexpression (OE))  
762 or the miRNA-320a sponge. Cell monolayer on transwell inserts was assessed by adding 4 kD  
763 FITC-dextran to the apical compartment and measuring fluorescence of the basal medium  
764 three hours post treatment every 24 hours for four days. Values shown represent the mean  
765 (+/- SEM) of N=12 from quadruplicate experiments (A) and N=3 from triplicate experiments  
766 (B), \*= P: 0.0174 (two-way Anova).

767

768

769 **Supplementary Information**

770 **Supplementary Figure 1**

771 **HIF-1 $\alpha$  modulation through pharmacological treatment and shRNA knock-down.** (A) RNA  
772 samples of normoxic and hypoxic cultures of T84 taken in 24-hour intervals for four days were  
773 analyzed by qPCR for the expression of the hypoxia-induced genes VEGF and Ca9. (B) T84 cells  
774 were seeded on transwell inserts and incubated under normoxic conditions in the presence  
775 or absence of DMOG. RNA was isolated and the upregulation of VEGF and Ca9 were evaluated  
776 by qPCR. (C) T84 cells expressing a shRNA against HIF-1 $\alpha$  were evaluated for their expression  
777 of HIF-1 $\alpha$ . (A-C) Values shown represent the mean plus standard deviation of three (A) or four  
778 (B,C) independent experiments, \*= P < 0.05, \*\*= P < 0.01, \*\*\*= P < 0.001, n.s. = not significant  
779 (one-sample t-test on log-transformed fold changes).

780

781 **Supplementary Figure 2**

782 **Pathway analysis by KEGG and MetaCore reveals miRNA-320a, miRNA-34a-5p and miRNA-**  
783 **16-5p as regulators of tight- and adherens junction proteins.** (A) Target genes of significantly  
784 regulated miRNAs were retrieved from miRTarBase database v6.1 and subjected to KEGG  
785 pathway analysis. The 100 most targeted pathways by number of targeted genes are shown.  
786 (B) Number of targeted genes and percentage of targeted genes per pathway for barrier  
787 function related pathways. (C) MetaCore-driven pathway analysis identified three potential  
788 hypoxamiRs involved in barrier function establishment. Interaction maps are shown for (A)  
789 miRNA-320a, (B) miRNA-34a-5p and (C) miRNA-16-5p. miRNA of interest is marked by a red  
790 square, targeted proteins involved in barrier formation are underlined in red.

791

792 **Supplementary Figure 3**

793 **T84 cells overexpress miRNAs after lentiviral transduction.** T84 cells were selected to  
794 overexpress miR-320a, miR-16-5p, and miR-34a-5p through lentivirus transduction. Cells were  
795 harvested and the overexpression of each miRNA was evaluated by miScript PCR. Values  
796 shown represent the mean plus standard deviation of three independent experiments. \*= P <  
797 0.05, \*\*= P < 0.01, \*\*\*= P < 0.001 (one-sample t-test on log-transformed fold changes).

798

799 **Supplementary Figure 4**

800 **Confirmation of miRNA-320a and miRNA-320a sponge expression in T84 cells.** T84 cells  
801 overexpressing (OE) miRNA-320a or depleted of miRNA-320a by expression of a sponge were  
802 evaluated by miScript PCR. Values shown represent the mean plus standard deviation of three  
803 independent experiments. \*= P < 0.05, \*\*= P < 0.01, \*\*\*= P < 0.001 (one-sample t-test on log-  
804 transformed fold changes).

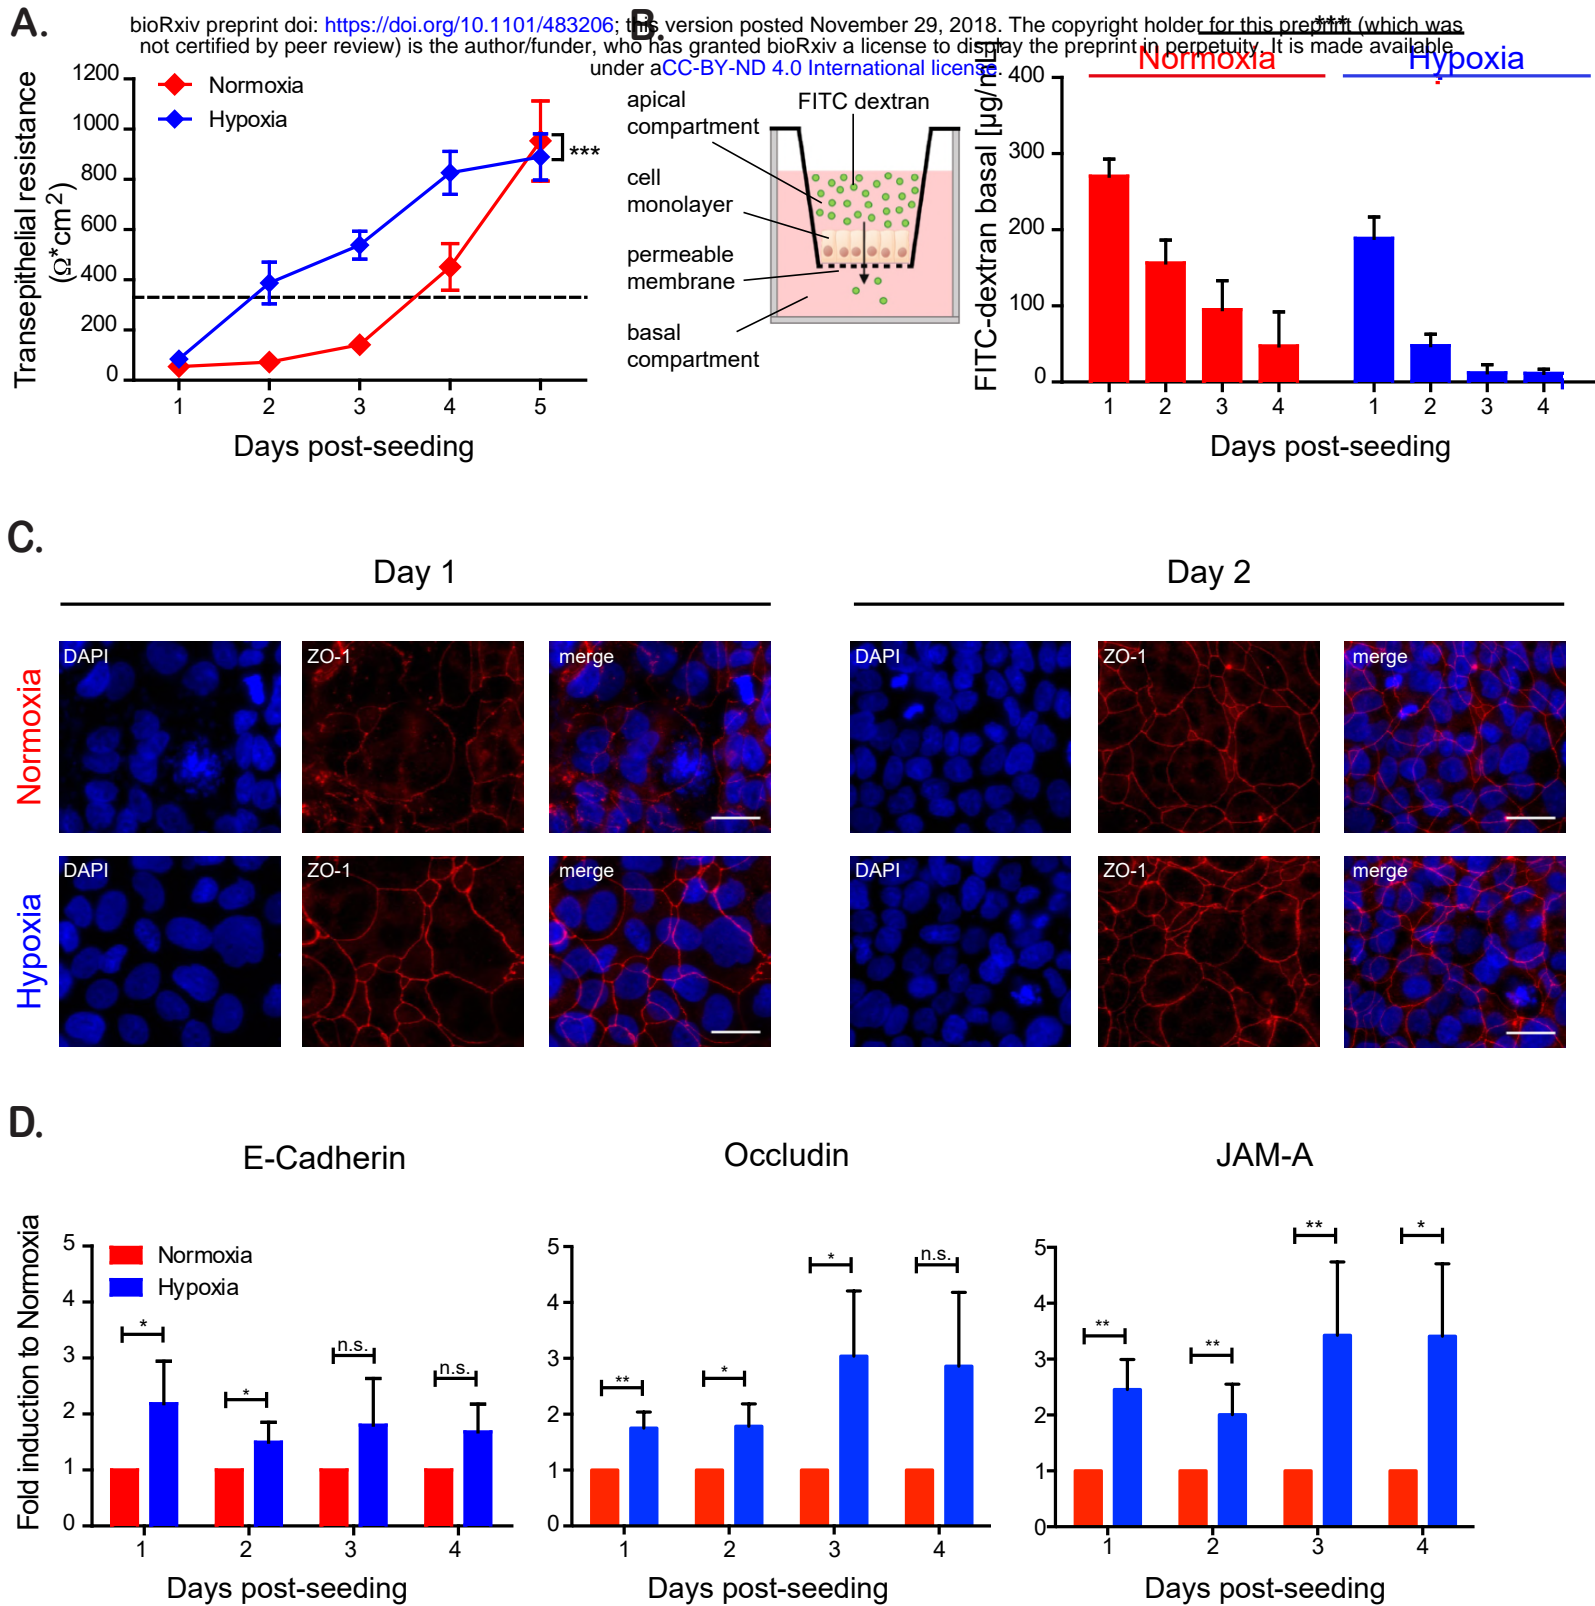

**Figure 1**

**Hypoxia improves barrier function in intestinal epithelial cells.** T84 cells were seeded onto transwell inserts and cultured for the indicated time under normoxic (21% O<sub>2</sub>) or hypoxic conditions (1% O<sub>2</sub>). (A) Rate of TEER increase over the cell monolayer was measured every 24 hours using the EVOM2 chopstick electrode. TEER greater than 330  $\Omega \cdot \text{cm}^2$  indicates complete barrier formation and is marked with a dotted line (33). (B) Paracellular permeability of the cell monolayer on transwell inserts was assessed by adding 4 kD FITC-dextran to the apical compartment (schematic overview left panel). Three hours post-incubation the basal medium was analyzed for an increase of fluorescence by spectrofluorometry (right panel). (C) T84 cultured for 24 and 48 hours under normoxic and hypoxic conditions were evaluated for the expression of the tight junction protein ZO-1 (red). Cell nuclei were stained with DAPI (blue). Scale bar indicates 25  $\mu\text{m}$ . Representative image shown. (D) RNA samples of normoxic and hypoxic cultures of T84 were analyzed by qPCR for the expression of tight junction-proteins E Cadherin, occludin and JAM-A. (A-B) Values shown represent the mean ( $\pm$  SEM) of N=9 from triplicate experiments. \*\*\*= $P < 0.0001$  (two-way Anova). (D) Experiments were performed in quadruplicate. Error bars indicate the standard deviation. \*= $P < 0.05$ , \*\*= $P < 0.01$ , n.s. = not significant (one-sample t-test on log-transformed fold changes).

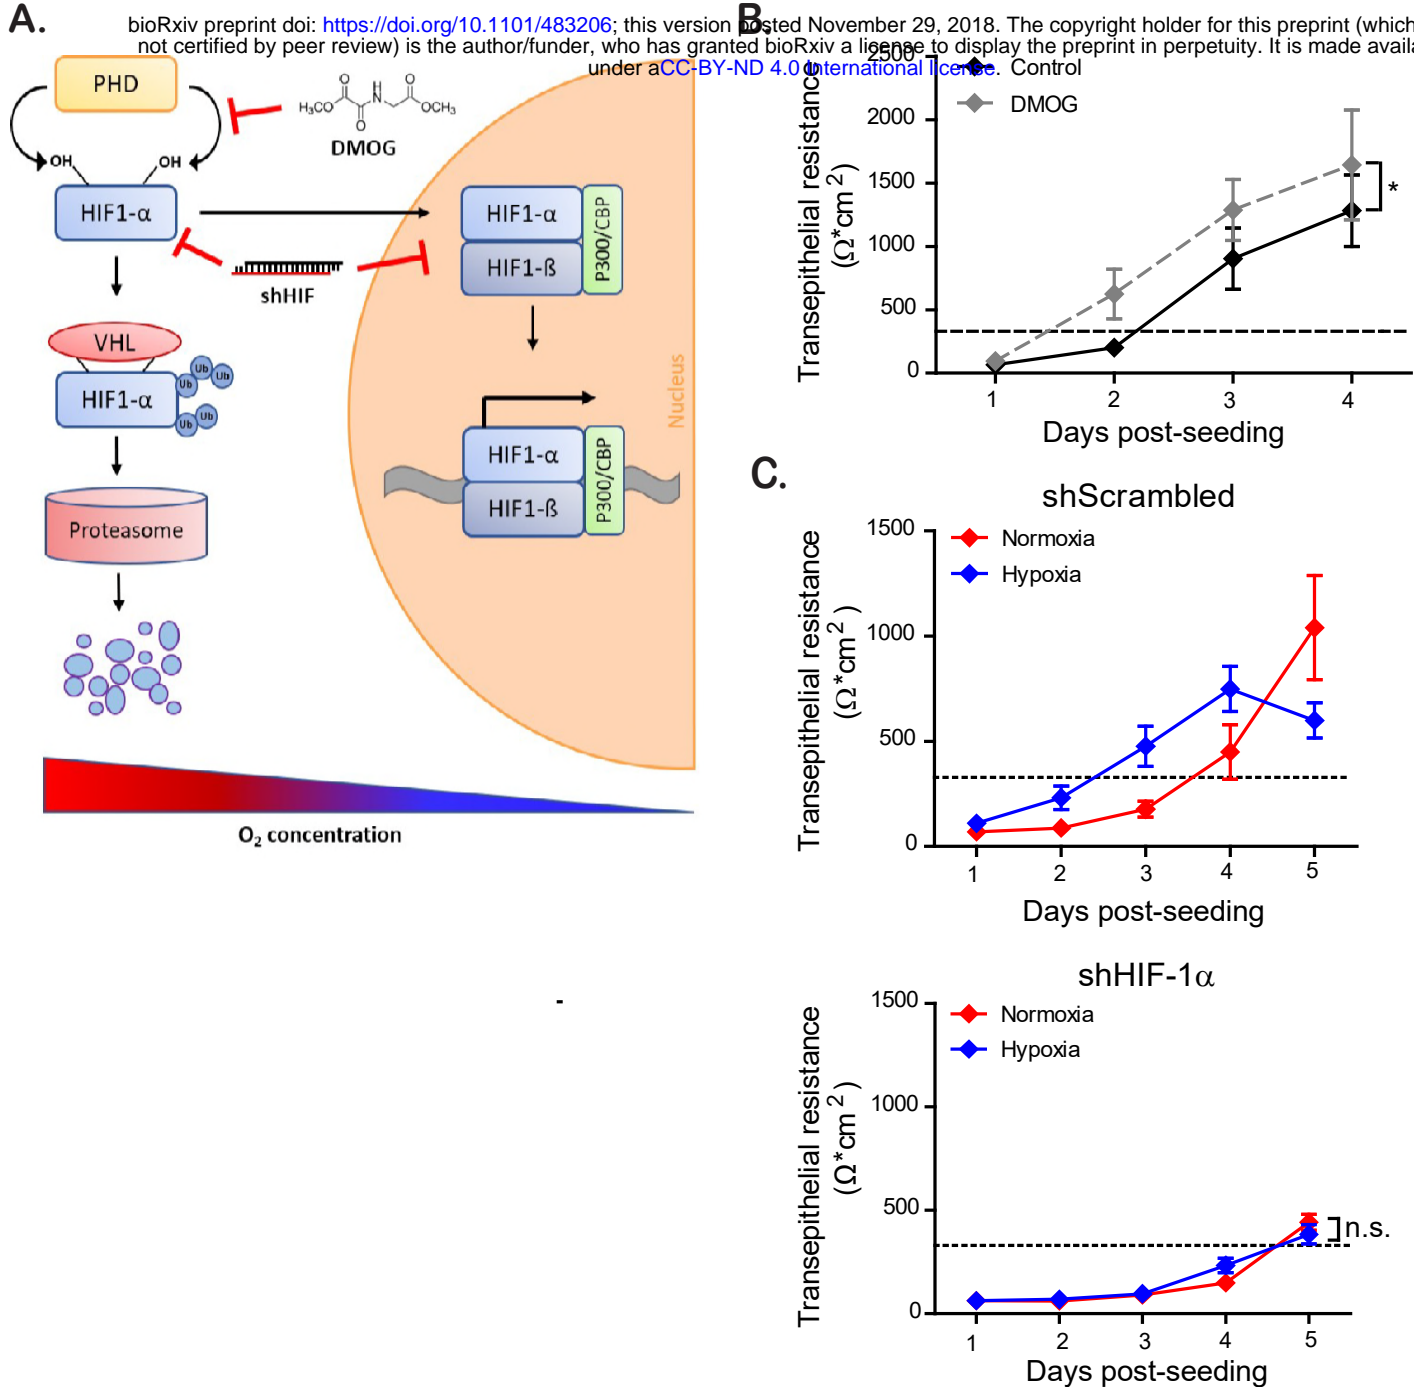

**Figure 2**

**HIF-1α is responsible for faster barrier establishment under hypoxic conditions.** (A) Schematic showing the regulation of the transcription factor HIF-1α at high and low oxygen concentrations. Under normoxic conditions, HIF-1α is hydroxylated at two specific proline residues by different prolyl hydroxylases (PHDs), leading to binding to the E3 ubiquitin ligase containing the von Hippel-Lindau (VHL) tumor suppressor protein. This mediates the polyubiquitination of HIF-1α and its downstream proteasomal degradation. Under hypoxic conditions, degradation is inhibited due to the lack of substrate for the PHDs, therefore stabilizing HIF-1α, leading to dimerization with its constitutively expressed β-subunit (HIF-1β) and subsequent gene expression. Pharmacological activation of HIF-1α-function by DMOG and inhibition by shRNA against HIF-1α mRNA are indicated by red arrows. (B) T84 cells were seeded on transwell inserts and incubated under normoxic conditions in the presence or absence of DMOG. TEER measurements were taken in 24-hour intervals for four days. (C) T84 cells depleted of HIF-1α through shRNA knock-down or expressing a scrambled shRNA were seeded on transwell inserts. Cells were incubated in normoxic or hypoxic conditions and TEER measurements were taken in 24-hour intervals for five days. TEER greater than 330 Ohm\*cm<sup>2</sup> indicates complete barrier formation and is marked with a dotted line (33). (B-C) Values shown represent the mean (+/- SEM) of N=9 from triplicate experiments. \* = P:0.0417 (two-way Anova), n.s. = not significant.



A.

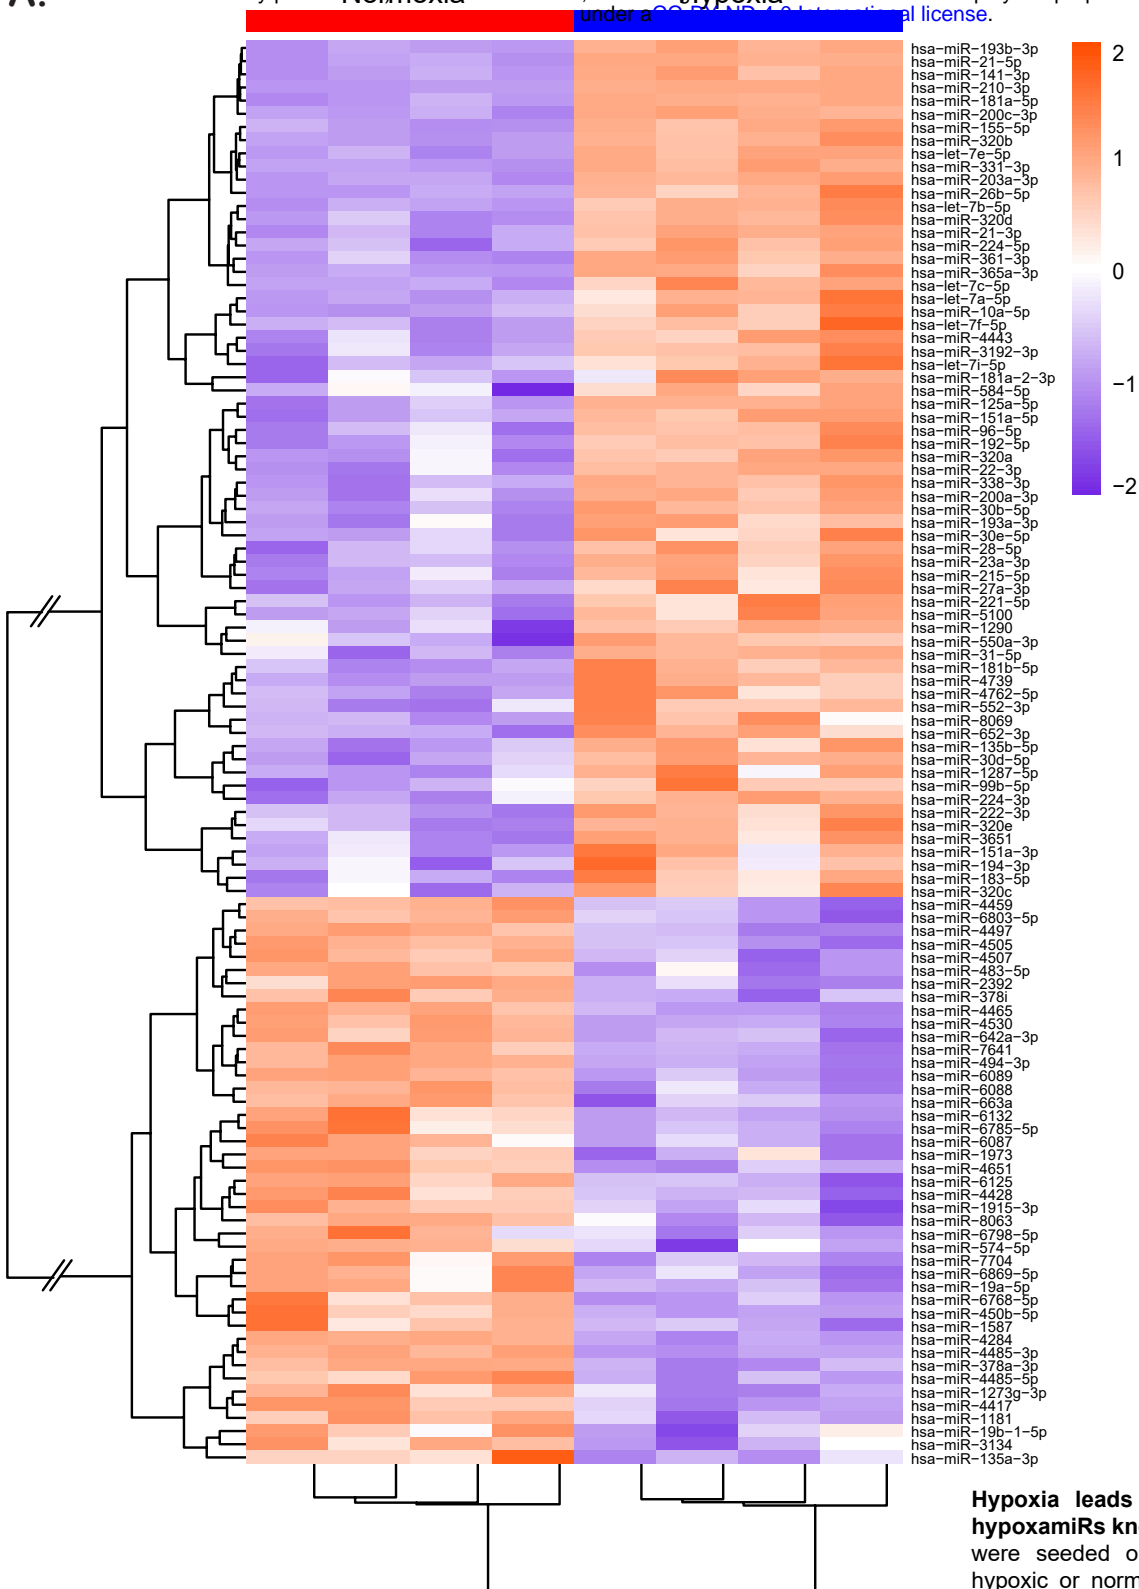

B.

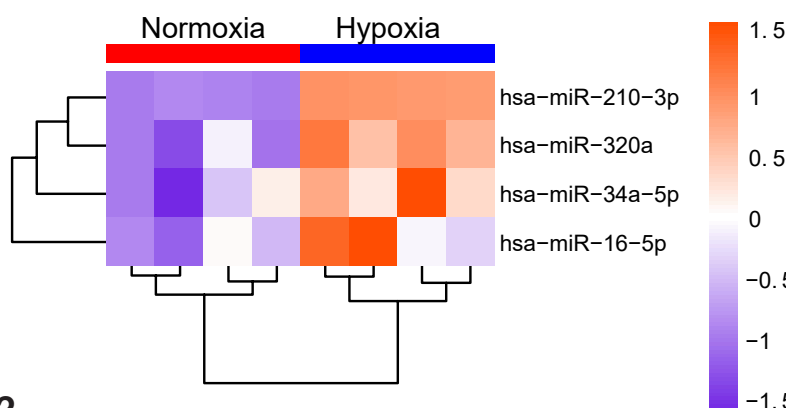

**Hypoxia leads to changes in expression of several hypoxamiRNAs known to regulate barrier function.** T84 cells

were seeded on transwell inserts and incubated under hypoxic or normoxic conditions for 48 hours. miRNA was isolated and evaluated by miRNA microarray. (A-B)

Heatmaps of differentially expressed miRNAs in T84 cells cultured under normoxic and hypoxic conditions. The color scale shown on the right illustrates the relative expression levels of differentially expressed miRNAs. Orange indicates up-regulated (>0), purple shows down-regulated miRNAs (<0). (A) Heatmap for 108 differentially regulated hypoxamiRNAs that were significantly up- or down-regulated compared to normoxic conditions. Connecting lines in the cluster dendrogram between up- and downregulated miRNAs were shortened to enable visualization (indicated by two skewed lines). (B) Heatmap of miRNA-210-3p (positive control for hypoxic conditions), miRNA-320a, miRNA-34a-5p and miRNA-16-5p, identified by pathway analysis for playing a role in barrier formation. (A-B) Samples were performed in quadruplicate and the level of expression of each replicate is shown in the heatmap.

Figure 3



**A.**

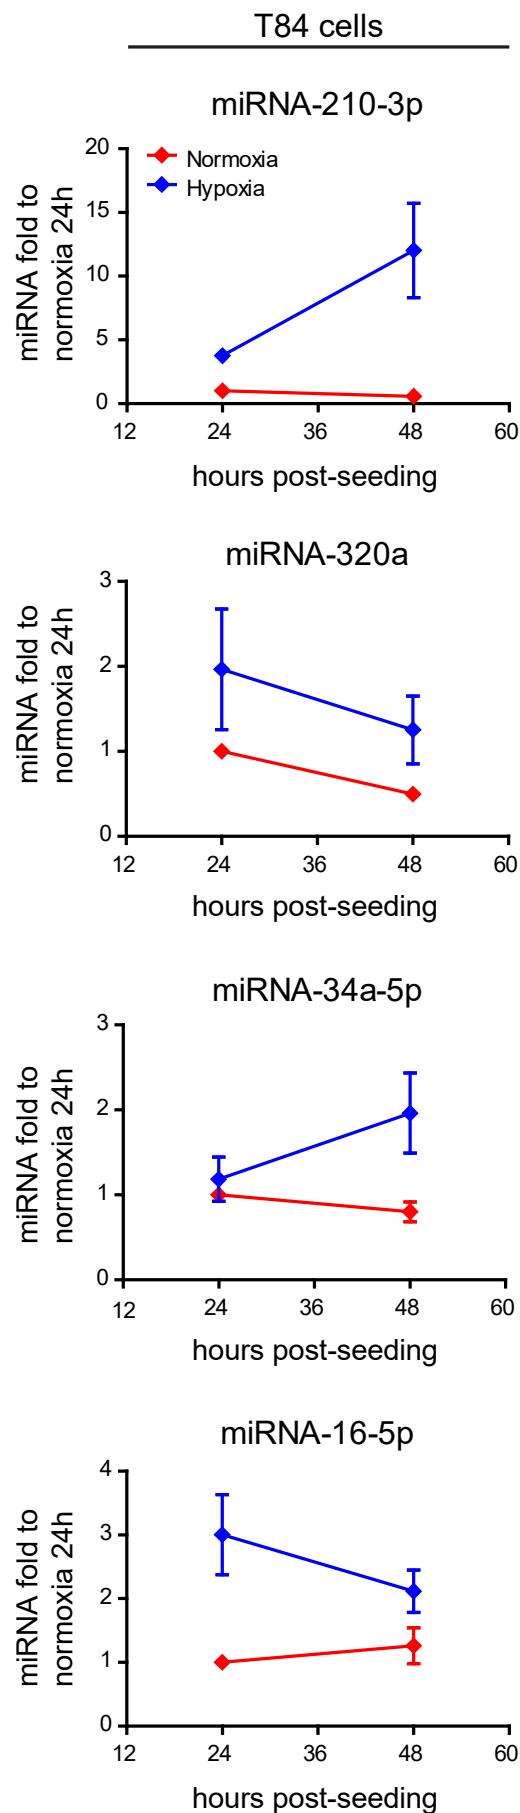

**B.**

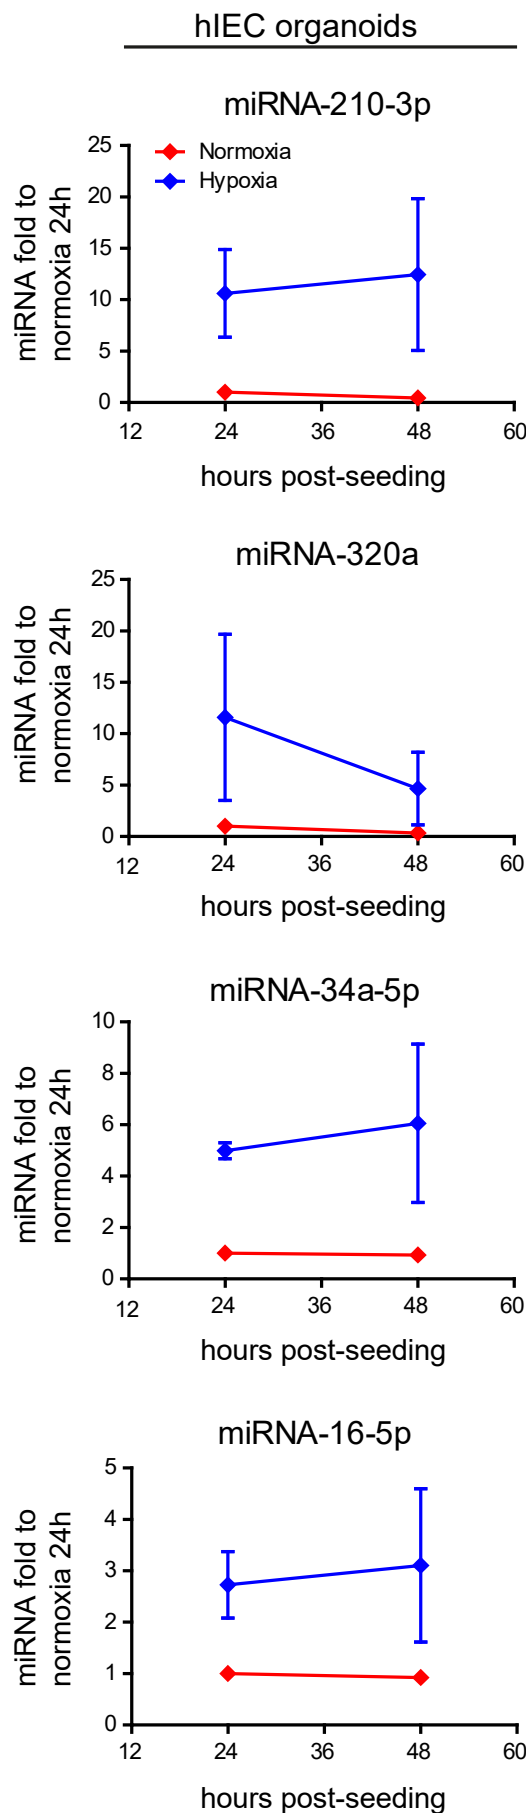

**Figure 4**

**Validation of upregulated hypoxamiRs in carcinoma derived T84 cells and primary human mini-gut organoids.** The expression of miRNA-210-3p (hypoxia control), miRNA-320a, miRNA 34a-5p and miRNA-16-5p was investigated 24 and 48 hours post transfer to hypoxia by qRT-PCR in (A) T84 and (B) human primary mini-gut organoids. Data was normalized to normoxic cells 24 hours post transfer. All experiments were performed in triplicate. Error bars indicate the standard error (SEM).

miRNA-320a

miRNA-16-5p

miRNA-34a-5p

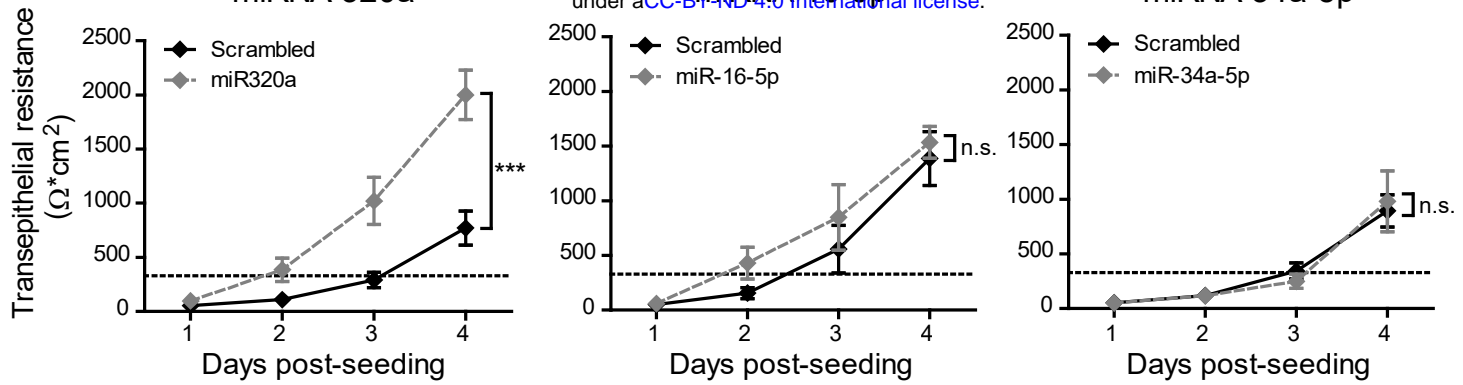

Figure 5

**Overexpression of miRNA-320a and miRNA 16-5p induces faster barrier formation in T84 cells.** T84 cells stably expressing miRNA-320a, miRNA-16-5p and miRNA-34a-5p by lentiviral transduction were seeded onto transwell inserts and barrier formation was assessed by TEER measurement in 24-hour intervals over four days. TEER greater than 330  $\text{Ohm} \cdot \text{cm}^2$  indicates complete barrier formation and is marked with a dotted line (33). Values shown represent the mean ( $\pm$  SEM) of N=6 (miRNA-16-5p & miRNA-34a-5p) or N=12 (miRNA-320a) from triplicate or quadruplicate experiments, respectively. \*\*\*= P:0.0002 (two-way Anova), n.s. = not significant.

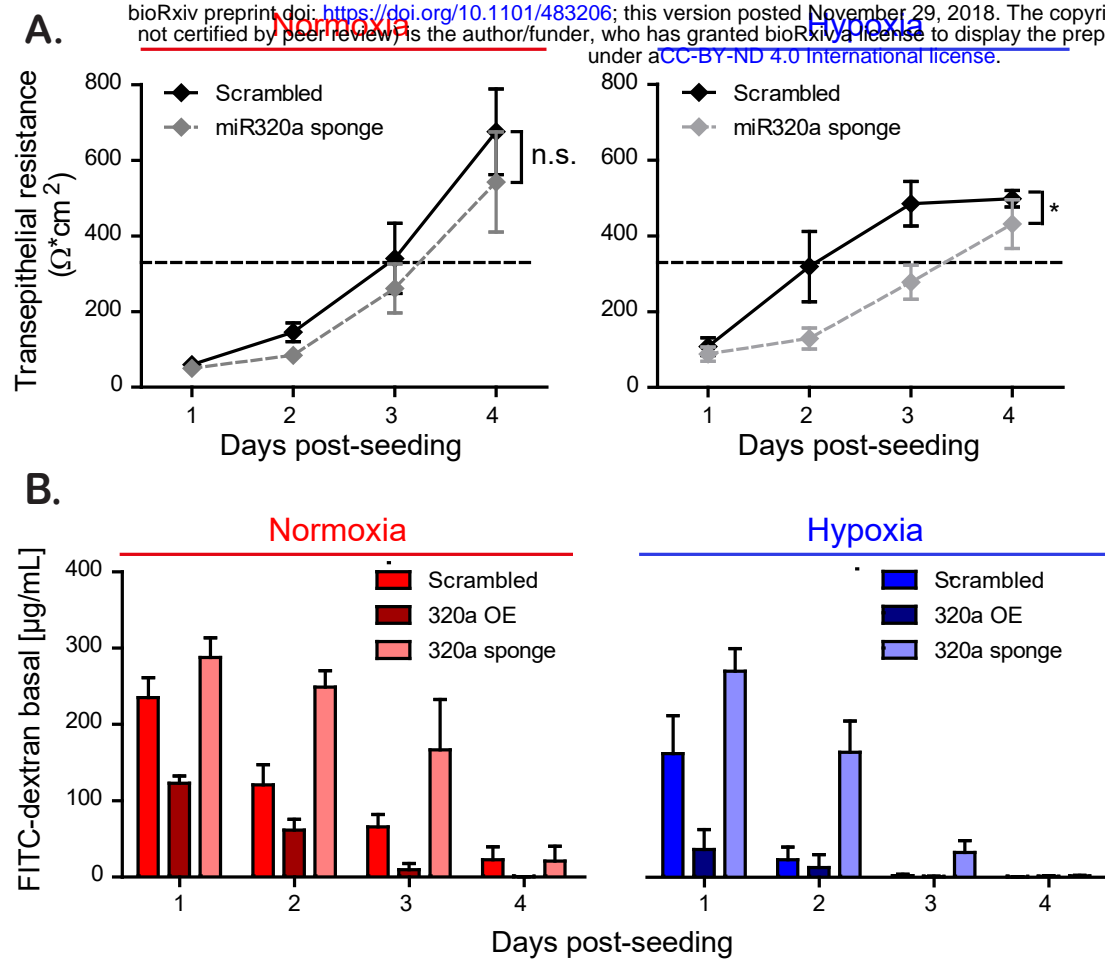

**Figure 6**

**Inhibition of miRNA-320a expression diminishes barrier formation in T84 cells.** (A) T84 cells stably expressing miRNA-320a sponge were seeded onto transwell inserts and barrier function was assessed by TEER measurements in 24-hours intervals over four days. TEER greater than 330  $\Omega \cdot \text{cm}^2$  indicates complete barrier formation and is marked with a dotted line (33). (B) Paracellular permeability of T84 cells overexpressing the miRNA-320a (overexpression (OE)) or the miRNA-320a sponge. Cell monolayer on transwell inserts was assessed by adding 4 kD FITC-dextran to the apical compartment and measuring fluorescence of the basal medium three hours post treatment every 24 hours for four days. Values shown represent the mean ( $\pm$  SEM) of N=12 from quadruplicate experiments (A) and N=3 from triplicate experiments (B), \* = P: 0.0174 (two-way Anova).

A.

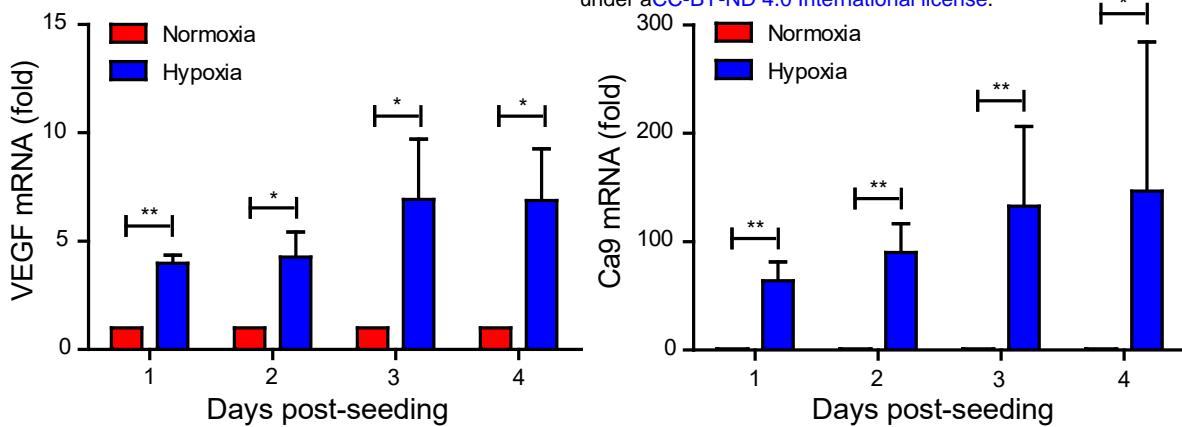

B.

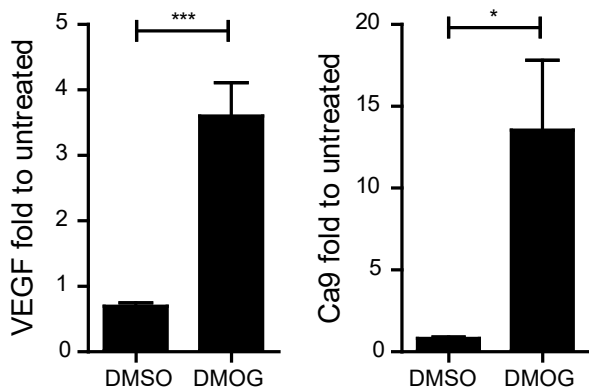

C.

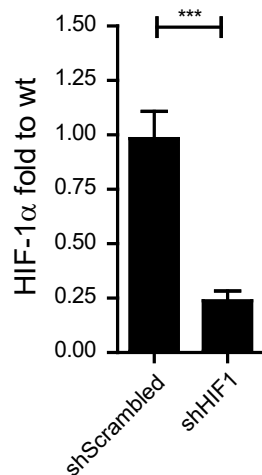

## Suppl. Figure 1

**HIF-1 $\alpha$  modulation through pharmacological treatment and shRNA knock-down.** (A) RNA samples of normoxic and hypoxic cultures of T84 taken in 24-hour intervals for four days were analyzed by qPCR for the expression of the hypoxia-induced genes VEGF and Ca9. (B) T84 cells were seeded on transwell inserts and incubated under normoxic conditions in the presence or absence of DMOG. RNA was isolated and the upregulation of VEGF and Ca9 were evaluated by qPCR. (C) T84 cells expressing a shRNA against HIF-1 $\alpha$  were evaluated for their expression of HIF-1 $\alpha$ . (A-C) Values shown represent the mean plus standard deviation of three (A) or four (B,C) independent experiments, \* =  $P < 0.05$ , \*\* =  $P < 0.01$ , \*\*\* =  $P < 0.001$ , n.s. = not significant (one-sample t-test on log-transformed fold changes).

A.

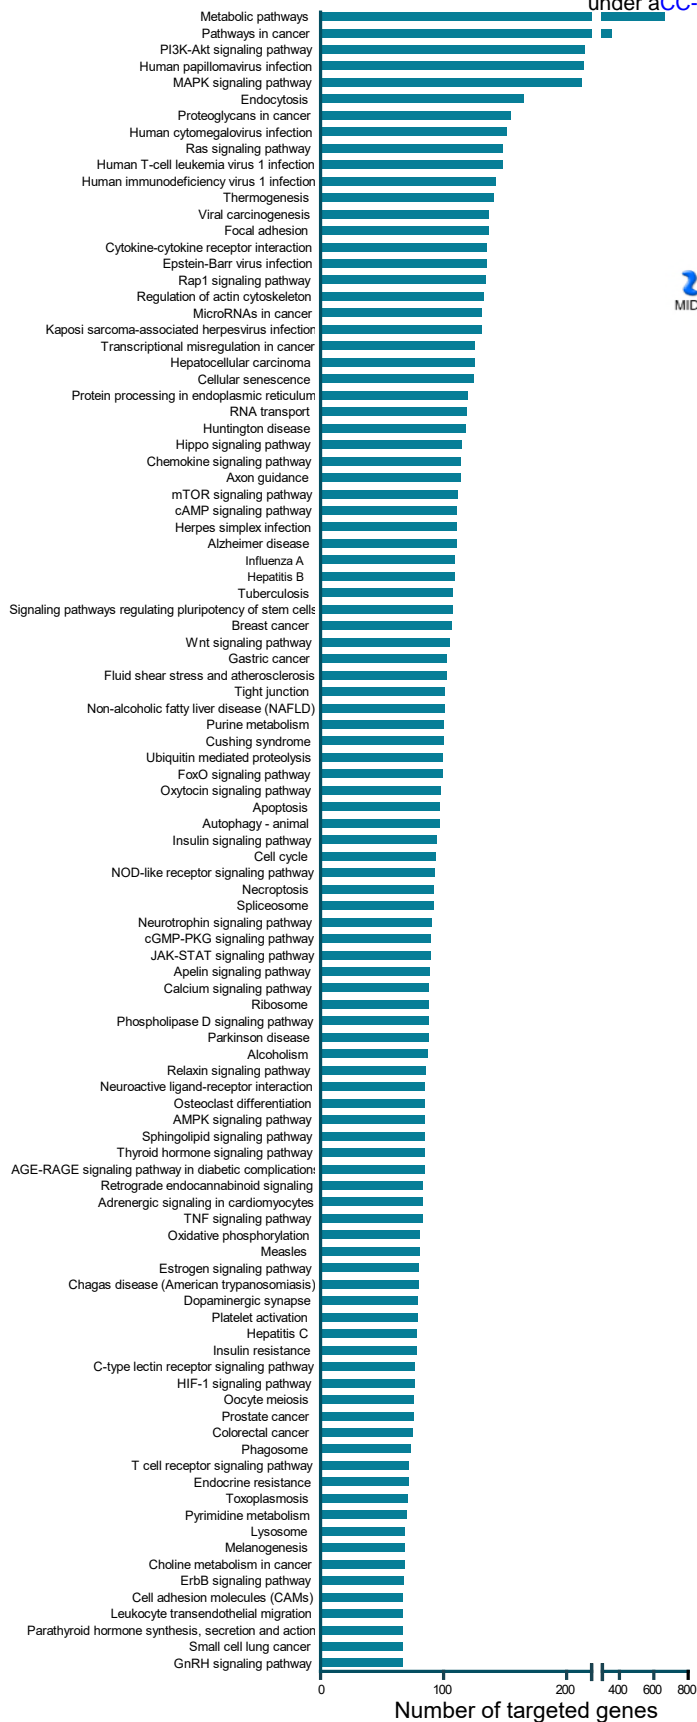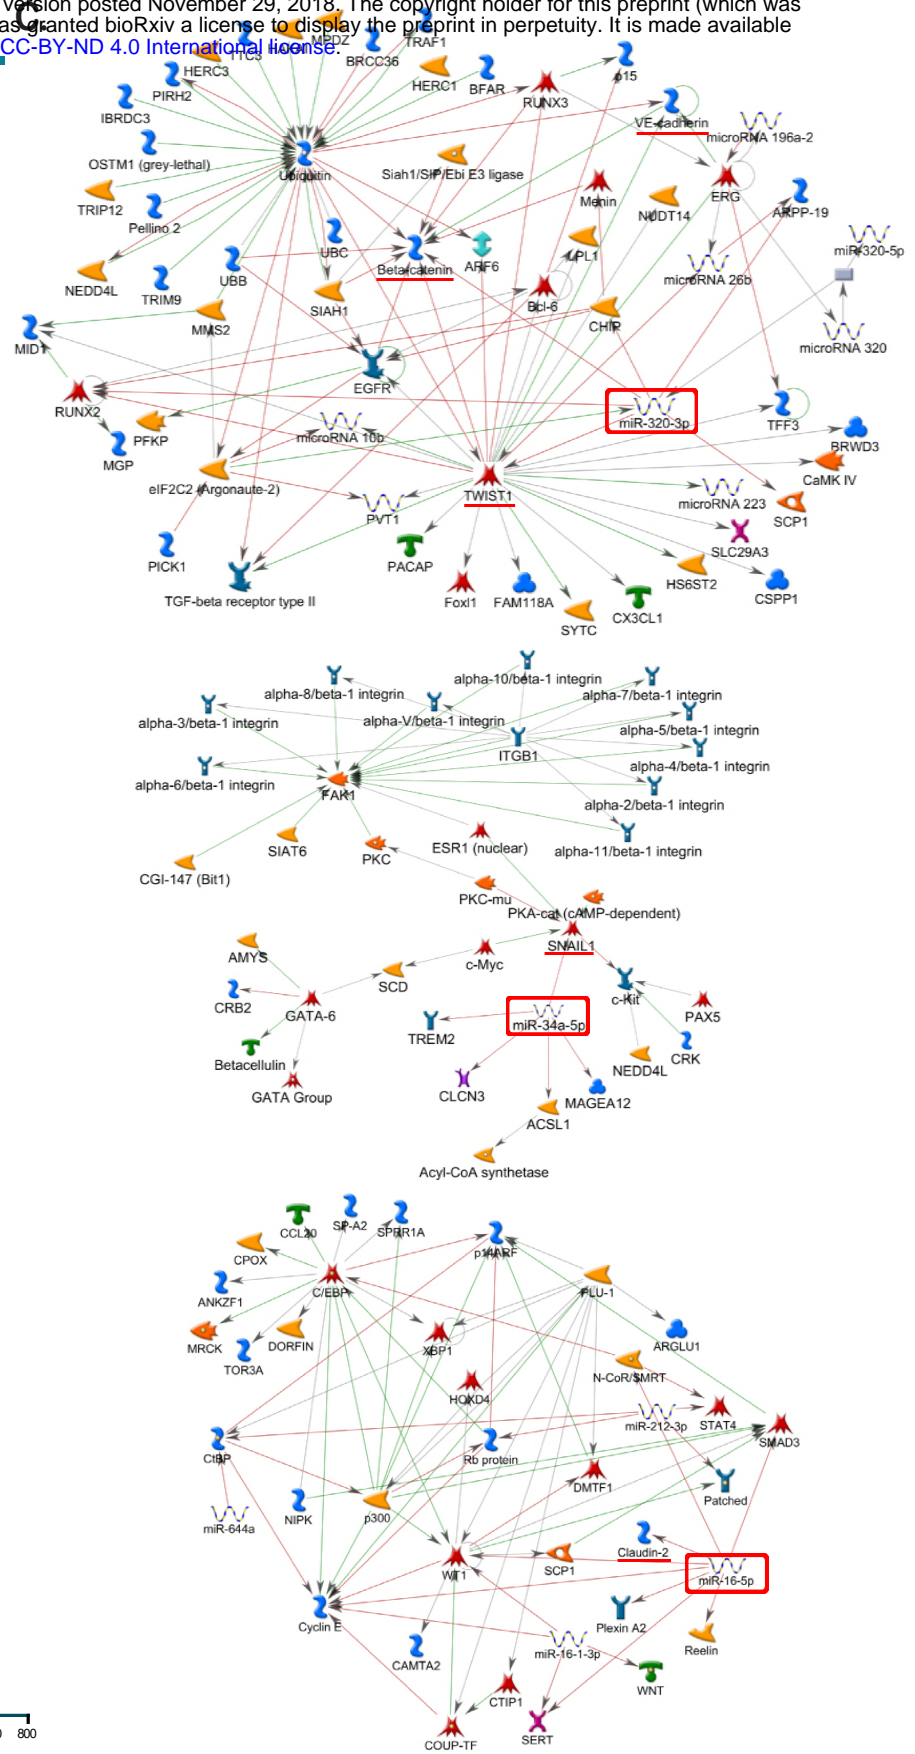

B.

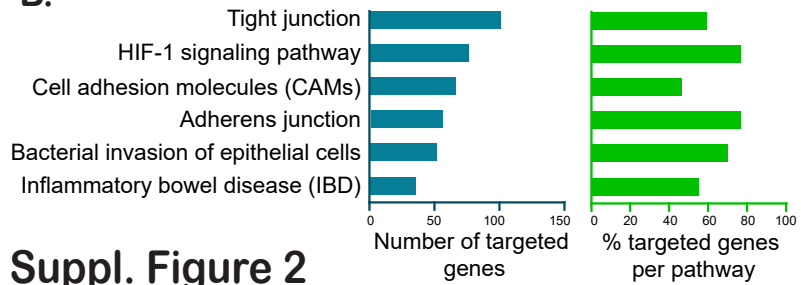

**Pathway analysis by KEGG and MetaCore reveals miRNA-320a, miRNA-34a-5p and miRNA-16-5p as regulators of tight- and adherens junction proteins.** (A) Target genes of significantly regulated miRNAs were retrieved from miRTarBase database v6.1 and subjected to KEGG pathway analysis. The 100 most targeted pathways by number of targeted genes are shown. (B) Number of targeted genes and percentage of targeted genes per pathway for barrier function related pathways. (C) MetaCore-driven pathway analysis identified three potential hypoxamiRs involved in barrier function establishment. Interaction maps are shown for (A) miRNA-320a, (B) miRNA-34a-5p and (C) miRNA-16-5p. miRNA of interest is marked by a red square, targeted proteins involved in barrier formation are underlined in red.

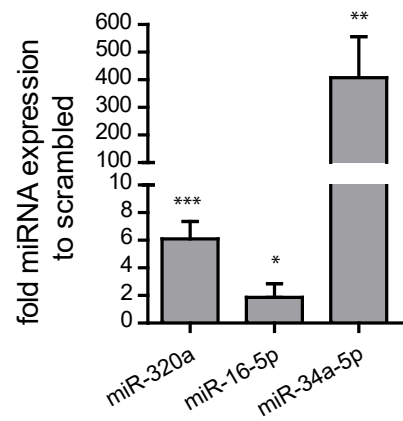

### Suppl. Figure 3

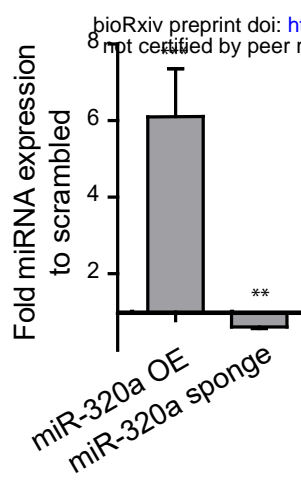

Suppl. Figure 4
